# Supplementary material for: The critical role of aqueous-phase processes in aromatic-derived nitrogen-containing organic aerosol formation in cities with different energy consumption patterns
Source: Copernicus journal article supplement (doi:10.5194/acp-25-2763-2025), 2025-03-04
Supplement: Supplementary file 1 [file acp-25-2763-2025-supplement.pdf]

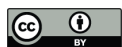

*Supplement of*

**The critical role of aqueous-phase processes in aromatic-derived nitrogen-containing organic aerosol formation in cities with different energy consumption patterns**

Yi-Jia Ma et al.

*Correspondence to:* Yu Xu (xuyu360@sjtu.edu.cn)

The copyright of individual parts of the supplement might differ from the article licence.

## **Table of Contents**

Sect. S1–Sect. S4

Table S1–Table S13

Figure S1–Figure S14

## Sect. S1. UPLC-ESI-QToFMS Analysis

The samples were analyzed using an Acquity UPLC coupled to a Xevo G2-XS QToF-MS (Waters), which is equipped with an electrospray ionization (ESI) source. The instrument offers a mass resolving power of  $\geq 40\,000$  at full width at half maximum (FWHM) ( $m/z$  956) (Wang et al., 2021b; Wang et al., 2021c). This high resolution ensures precise determination of molecular formulas. Data acquisition and processing were performed using MassLynx version 4.2 software. A mass tolerance of 5 ppm was applied to calculate potential molecular formulas for each detected ion. Instrument calibration was performed prior to each analysis to ensure the accuracy and reliability of the measurements.

Compounds with identical molecular formulas were summed without distinguishing isomers, as isomer differentiation based on retention time or fragmentation spectra is beyond the scope of this study. This approach aligns with recent studies using Fourier transform-ion cyclotron resonance mass spectrometry (FT-ICR MS) (Sun et al., 2024; Jiang et al., 2023; Su et al., 2021). The observed molecular formulas reflect the cumulative sum of isomeric species, as this method cannot differentiate them. The detected compounds ranged from  $m/z$  50 to 700 (Ma et al., 2024; Ungeheuer et al., 2021; Praplan et al., 2014), covering small organic acids to larger secondary organic aerosol components. This range was well within the instrument's capabilities.

The addition of formic acid to the mobile phase played a crucial role in achieving optimal chromatographic separation and enhancing ionization efficiency during ESI–

MS analysis (Núñez and Paolo, 2014; Kuehnbaum and Britz-McKibbin, 2013). This approach is widely employed in the analysis of atmospheric organic compounds (Zhang et al., 2024; Abudumutailifu et al., 2024; Wang et al., 2021a). Although the acidic conditions introduced by formic acid may affect certain CHON compounds through hydrolysis or acid-catalyzed reactions, the aerosols analyzed in this study were generally acidic or mildly acidic (average pH values of 3–5). Additionally, the short elution time (18 minutes) minimized the likelihood of significant chemical changes to the compounds.

## Sect. S2. Parameter calculation and compound classification

The concentrations of non-sea-salt (nss)  $\text{Cl}^-$  and  $\text{K}^+$  were estimated using the following equation, based on Ni et al. (2013).

$$[\text{nss-X}] = [\text{X}] - [\text{Na}^+] \times a \quad (\text{S1})$$

Here,  $[\text{X}]$  represents the concentrations of  $\text{Cl}^-$  and  $\text{K}^+$ , and  $a$  represents the typical ratio of the species to  $\text{Na}^+$  in seawater, where  $([\text{Cl}^-]/[\text{Na}^+] = 1.80$  and  $[\text{K}^+]/[\text{Na}^+] = 0.036)$ .

The double-bond equivalent (DBE) indicates the number of rings and double bonds in a molecule (Lechtenfeld et al., 2014; Bae et al., 2011). It was calculated as follows:

$$\text{DBE} = (2N_C + 2 - N_H + N_N) / 2 \quad (\text{S2})$$

Here,  $N_C$ ,  $N_H$ , and  $N_N$  denote the numbers of carbon (C), hydrogen (H), and nitrogen (N) atoms, respectively.

The carbon oxidation state ( $\text{OS}_C$ ) is a key indicator of the compositional evolution of oxidized organic compounds (Kroll et al., 2011). It was calculated as follows:

$$\text{OS}_C \approx 2 \times N_O / N_C - N_H / N_C \quad (\text{S3})$$

Here,  $N_C$ ,  $N_H$ , and  $N_O$  refer to the numbers of carbon, hydrogen, and oxygen atoms in a molecule, respectively.

The modified aromaticity index ( $\text{AI}_{\text{mod}}$ ) aids in identifying and characterizing aromatic-like compounds in aerosols (Xu et al., 2023; Zhong et al., 2023). It was calculated as follows:

$$\text{AI}_{\text{mod}} = (1 + N_C - 0.5 \times N_O - N_S - 0.5 \times N_N - 0.5 \times N_H) / (N_C - 0.5 \times N_O - N_S - N_N) \quad (\text{S4})$$

Here,  $N_C$ ,  $N_H$ ,  $N_O$ ,  $N_N$  and  $N_S$  represent the numbers of carbon, hydrogen, oxygen, nitrogen, and sulfur atoms in the molecular formula, respectively.

The van Krevelen diagrams and  $AI_{\text{mod}}$  values are widely used to classify organic compounds into specific categories (Xu et al., 2023; Su et al., 2021; Seidel et al., 2014).

Based on these methods, the identified subgroups in this study include:

Saturated-like molecules (Sa,  $H/C \geq 2.0$ );

Unsaturated aliphatic-like molecules (UA,  $1.5 \leq H/C < 2.0$ );

Highly unsaturated-like molecules (HU,  $AI_{\text{mod}} \leq 0.5$  and  $H/C < 1.5$ );

Highly aromatic-like molecules (HA,  $0.5 < AI_{\text{mod}} \leq 0.66$ );

Polycyclic aromatic-like molecules (PA,  $AI_{\text{mod}} > 0.66$ ).

The aromaticity equivalent ( $X_C$ ), a modified index for aromatic compounds, was calculated as follows:

$$X_C = [3 \times (\text{DBE} - (p \times o + q \times s)) - 2] / [\text{DBE} - (p \times o + q \times s)] \quad (\text{S5})$$

Here, DBE represents the double bond equivalence.  $p$  and  $q$  are the fractions of oxygen and sulfur atoms, respectively, that contribute to the  $\pi$ -bond structure of the molecule.

In this study,  $p = q = 1$  was applied for compounds detected in ESI+ and  $p = q = 0.5$  was applied for compounds detected in ESI- (Wang et al., 2021a). The thresholds of  $X_C \geq 2.50$  and  $X_C \geq 2.71$  were used to identify monoaromatic and polyaromatic compounds, respectively (Yassine et al., 2014).

Many previous studies on organic aerosol molecular composition have utilized the peak intensities of species to highlight the relative abundance of specific compound groups (Wang et al., 2021a; Song et al., 2018; Zou et al., 2023). However, it should be

noted that different organic compounds may exhibit varying signal responses in the mass spectrometer due to differences in their ionization and transmission efficiencies (Schmidt et al., 2006; Krueve et al., 2014; Leito et al., 2008). Here, an intercomparison (mainly conducted among samples within this study) of compound relative abundance was conducted without considering the differentiation of ionization efficiency, as indicated by many previous studies (Song et al., 2018; Wang et al., 2021a; Zou et al., 2023). Furthermore, the peak intensity-weighted average molecular mass (MM), elemental ratios, DBE,  $X_C$ ,  $AI_{mod}$ , and  $OS_C$  for the molecular formula  $C_cH_hO_oN_n$  were calculated using the following equations:

$$MM_w = \sum (MM_i \times A_i) / \sum A_i \quad (S6)$$

$$O/C_w = \sum (O/C_i \times A_i) / \sum A_i \quad (S7)$$

$$H/C_w = \sum (H/C_i \times A_i) / \sum A_i \quad (S8)$$

$$N/C_w = \sum (N/C_i \times A_i) / \sum A_i \quad (S9)$$

$$O/N_w = \sum (O/N_i \times A_i) / \sum A_i \quad (S10)$$

$$DBE_w = \sum (DBE_i \times A_i) / \sum A_i \quad (S11)$$

$$X_{Cw} = \sum (X_{Ci} \times A_i) / \sum A_i \quad (S12)$$

$$AI_{modw} = \sum (AI_{modi} \times A_i) / \sum A_i \quad (S13)$$

$$OS_{Cw} = \sum (OS_{Ci} \times A_i) / \sum A_i \quad (S14)$$

Here,  $A_i$  represents the peak signal intensity for each individual compound  $i$ .

### **Sect. S3. The improved classification method for identifying precursors of NOCs**

Identifying the precursors of aerosol NOCs is challenging due to their complex sources and variable atmospheric processes. Based on established atmospheric reactions, recent studies have identified the potential precursors of organic compounds in aerosols (Nie et al., 2022; Guo et al., 2022b). Building on these advancements, Jiang et al. (2023) further refined the classification for CHON<sup>-</sup> compounds in the ambient aerosols. In this study, we improved this identification process to classify Re-NOC precursors. Specifically, the classification of CHON<sup>+</sup> and CHON<sup>-</sup> compounds was refined into the following categories: aliphatic-, heterocyclic-, and aromatic-derived Re-NOCs, as well as isoprene-, monoterpene-, aliphatic-, and aromatic-derived Ox-NOCs. Details of the specific classification process are illustrated in **Figure S2**. In particular, the isoprene-CHON and monoterpene-CHON lists, obtained from previous field observation and laboratory experiments (Ng et al., 2008; Xu et al., 2021b; Zhao et al., 2021; Tian et al., 2023; Wu et al., 2021; Shen et al., 2022; Draper et al., 2015; Pullinen et al., 2020; Guo et al., 2022a; Shen et al., 2021; Xu et al., 2021a; DeVault and Ziemann, 2021; Guo et al., 2022b), are summarized in **Table S2** and **Table S3**. If the identified molecular formulas were included in the aforementioned lists, these species were directly categorized as isoprene-derived CHON or monoterpene-derived CHON compounds (Jiang et al., 2023). For CHN<sup>+</sup> compounds, they were classified into aliphatic, monoaromatic, and polyaromatic CHN<sup>+</sup> compounds based on established criteria (Wang et al., 2021a; Yassine et al., 2014).



#### **Sect. S4. Classification of possible aqueous-phase processes of NOCs based on precursor-product pairs**

To identify potential aqueous-phase processes involved in aerosol NOC formation, we screened precursor-product pairs from the identified organic compounds. The identification of such pairs has been widely applied to infer the potential formation pathways of Ox-NOCs in urban snow, roadside ambient aerosols, and urban aerosols in China (Su et al., 2021; Xu et al., 2023; Jiang et al., 2023). The main reaction pathways proposed by the precursor-product pairs theory are detailed as follows.

Reactions of alcohols, diols, and hydroxyketones with  $\text{N}_2\text{O}_5$  are suggested to contribute to the formation of organic nitrates (Kames et al., 1993), as shown in SR1:

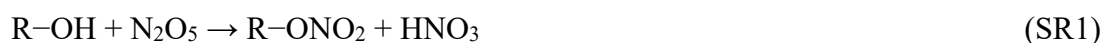

To investigate the potential reaction products and precursors of CHON compounds, R-OH and R-ONO<sub>2</sub> were defined as an oxidation-product pair. This pair is characterized by an elemental difference of -H and +NO<sub>2</sub>.

In addition, organic nitrates are likely hydrolyzed to alcohols at varying rates (Boyd et al., 2015; Darer et al., 2011), as simplified below (SR2).

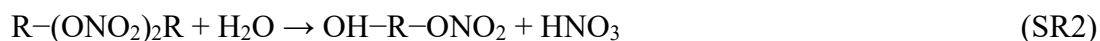

Here, R-(ONO<sub>2</sub>)<sub>2</sub>R and OH-R-ONO<sub>2</sub> were defined as a hydrolysis-product pair, characterized by an elemental difference of +H and -NO<sub>2</sub>. Furthermore, NOCs may also involve both oxidation and hydrolysis processes (Su et al., 2021; Jiang et al., 2023), referred to as ox\_hy\_N process. The remaining unidentified NOCs were attributed to unknown processes, denoted as the unknown\_N process (**Fig. S5**).

The formation pathways of Re-NOCs (mainly CHON<sup>+</sup> compounds in this study) can be classified into three main types, including condensation, hydrolysis, and dehydration processes (Sun et al., 2024). The condensation process (denoted as cond\_N) can be divided into two types of reactions. One involves imination reactions (characterized by +NH and -O) between carbonyl compounds and NH<sub>4</sub><sup>+</sup> (or NH<sub>3</sub>) (SR3), resulting in the formation of imines (Lv et al., 2022; Liu et al., 2023a; Wang et al., 2024; Abudumutailifu et al., 2024; Sun et al., 2024; Liu et al., 2023b).

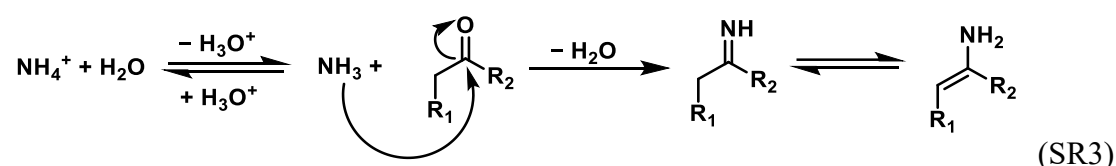

Another reaction involves the intramolecular N-heterocyclic pathway (characterized by +N and -HO<sub>2</sub>) (SR4), which builds upon the reaction in SR3 (Laskin et al., 2010; Laskin et al., 2014; Liu et al., 2023b).

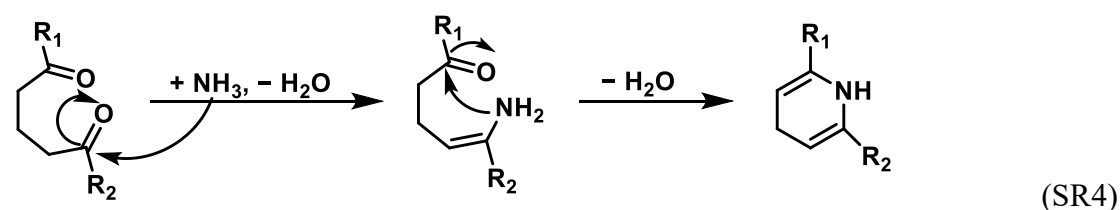

Recent studies suggested that dehydration processes (denoted as de\_N process) may occur in aerosols and fog water (Sun et al., 2024), as well as in the photochemical transformation of organic compounds in the aqueous phase (Lian et al., 2020).

Re-NOCs can also undergo hydrolyzation processes (hy\_N), which are similar to those observed in Ox-NOCs. In addition, the aqueous-phase processes of CHON<sup>+</sup> can be associated with the aforementioned formation pathways, including cond\_hy\_N (involving cond\_N and hy\_N), cond\_de\_N (involving cond\_N and de\_N), hy\_de\_N

(involving hy\_N and de\_N), and cond\_hy\_de\_N (involving cond\_N, hy\_N and de\_N) (**Fig. S4**). Another significant component of Re-NOCs is the CHN<sup>+</sup> compounds. Since CHN<sup>+</sup> compounds lack oxygen atoms, it is unlikely that they will be formed by hydrolysis processes. Accordingly, their potential formation mechanisms include cond\_N, de\_N, cond\_de\_N, and unknown\_N pathways. The abbreviations, types, and more details for these processes were summarized in **Table S4**. The specific strategies for identifying different formation pathways of NOCs were illustrated in **Figs. S3–S5**.

**Table S1.** The mean values ( $\pm$  SD) of major parameters observed across cities and time periods.

| City                                                        | HEB               |                    |                   | BJ                  |                     |                   | HZ                  |                     |                     |               |
|-------------------------------------------------------------|-------------------|--------------------|-------------------|---------------------|---------------------|-------------------|---------------------|---------------------|---------------------|---------------|
|                                                             | Period            | All                | Clean             | Haze                | All                 | Clean             | Haze                | All                 | Clean               | Haze          |
| Parameters                                                  | Mean $\pm$ SD     | Mean $\pm$ SD      | Mean $\pm$ SD     | Mean $\pm$ SD       | Mean $\pm$ SD       | Mean $\pm$ SD     | Mean $\pm$ SD       | Mean $\pm$ SD       | Mean $\pm$ SD       | Mean $\pm$ SD |
| T ( $^{\circ}$ C)                                           | $-17.3 \pm 5.2$   | $-17.0 \pm 6.7$    | $-17.6 \pm 1.4$   | $-1.6 \pm 2.1$      | $-0.9 \pm 2.1$      | $-2.9 \pm 1.5$    | $6.6 \pm 2.4$       | $5.1 \pm 1.6$       | $8.1 \pm 2.1$       |               |
| RH (%)                                                      | $66.2 \pm 5.9$    | $63.8 \pm 4.2$     | $69.4 \pm 6.4$    | $48.5 \pm 20.8$     | $35.2 \pm 6.5$      | $75.2 \pm 12.0$   | $73.8 \pm 16.9$     | $75.7 \pm 17.1$     | $72.0 \pm 16.4$     |               |
| Wind speed ( $\text{m s}^{-1}$ )                            | $2.6 \pm 0.8$     | $3.1 \pm 0.6$      | $1.9 \pm 0.6$     | $3.2 \pm 1.9$       | $3.9 \pm 1.9$       | $1.7 \pm 0.5$     | $2.9 \pm 1.1$       | $3.3 \pm 1.2$       | $2.6 \pm 0.8$       |               |
| PM <sub>2.5</sub> ( $\mu\text{g m}^{-3}$ )                  | $90.6 \pm 62.4$   | $45.3 \pm 16.8$    | $154.0 \pm 45.3$  | $52.7 \pm 51.4$     | $19.9 \pm 11.0$     | $118.3 \pm 35.2$  | $69.1 \pm 26.9$     | $47.4 \pm 16.7$     | $90.9 \pm 14.9$     |               |
| O <sub>3</sub> ( $\mu\text{g m}^{-3}$ )                     | $37.8 \pm 10.0$   | $43.9 \pm 7.6$     | $29.4 \pm 6.1$    | $31.2 \pm 17.5$     | $41.0 \pm 12.5$     | $11.6 \pm 5.7$    | $26.4 \pm 17.1$     | $23.7 \pm 14.3$     | $29.1 \pm 19.1$     |               |
| NO <sub>2</sub> ( $\mu\text{g m}^{-3}$ )                    | $52.6 \pm 19.6$   | $39.1 \pm 7.7$     | $71.3 \pm 15.4$   | $46.5 \pm 22.6$     | $33.4 \pm 15.0$     | $72.5 \pm 7.8$    | $61.6 \pm 15.2$     | $54.9 \pm 14.5$     | $68.3 \pm 12.7$     |               |
| NO <sub>2</sub> + O <sub>3</sub> ( $\mu\text{g m}^{-3}$ )   | $90.4 \pm 11.7$   | $83.0 \pm 4.8$     | $100.7 \pm 10.8$  | $77.6 \pm 7.3$      | $74.4 \pm 5.9$      | $84.0 \pm 5.6$    | $88.0 \pm 17.6$     | $78.5 \pm 11.5$     | $97.4 \pm 17.5$     |               |
| •OH ( $\times 10^5$ molecule $\text{cm}^{-3}$ )             | $8.1 \pm 3.2$     | $9.5 \pm 3.0$      | $6.3 \pm 2.4$     | $9.8 \pm 4.7$       | $12.8 \pm 2.1$      | $3.7 \pm 1.3$     | $4.9 \pm 3.1$       | $4.5 \pm 3.4$       | $5.2 \pm 2.8$       |               |
| SO <sub>2</sub> ( $\mu\text{g m}^{-3}$ )                    | $56.2 \pm 18.0$   | $44.4 \pm 9.5$     | $72.7 \pm 13.7$   | $7.0 \pm 3.2$       | $6.1 \pm 2.9$       | $8.7 \pm 3.1$     | $13.1 \pm 3.4$      | $11.6 \pm 2.5$      | $14.6 \pm 3.5$      |               |
| CO ( $\text{mg m}^{-3}$ )                                   | $1.2 \pm 0.5$     | $0.8 \pm 0.1$      | $1.8 \pm 0.4$     | $1.1 \pm 0.8$       | $0.7 \pm 0.3$       | $2.1 \pm 0.5$     | $1.2 \pm 0.2$       | $1.1 \pm 0.2$       | $1.3 \pm 0.1$       |               |
| ALW <sup>a</sup> ( $\mu\text{g m}^{-3}$ )                   | $31.5 \pm 23.6$   | $17.3 \pm 12.6$    | $51.4 \pm 20.9$   | $48.9 \pm 109.6$    | $4.8 \pm 2.6$       | $136.9 \pm 156.3$ | $64.6 \pm 66.1$     | $52.1 \pm 42.8$     | $77.2 \pm 81.2$     |               |
| pH                                                          | $4.3 \pm 1.0$     | $4.0 \pm 1.2$      | $4.9 \pm 0.3$     | $6.3 \pm 1.7$       | $7.4 \pm 0.8$       | $4.1 \pm 0.6$     | $3.4 \pm 0.6$       | $3.5 \pm 0.3$       | $3.2 \pm 0.7$       |               |
| PBLH <sup>b</sup> (m)                                       | $339.0 \pm 183.3$ | $457.3 \pm 150.4$  | $173.4 \pm 44.2$  | $407.9 \pm 313.3$   | $501 \pm 335.9$     | $221.6 \pm 129.1$ | $414.1 \pm 239.0$   | $445 \pm 226.5$     | $383.2 \pm 247.0$   |               |
| VC <sup>c</sup> ( $\text{m}^2 \text{s}^{-1}$ )              | $974.8 \pm 673.2$ | $1415.1 \pm 530.5$ | $358.5 \pm 206.0$ | $1877.4 \pm 2608.4$ | $2592.4 \pm 2931.7$ | $447.4 \pm 393.9$ | $1431.2 \pm 1200.3$ | $1692.5 \pm 1318.0$ | $1169.8 \pm 1003.8$ |               |
| UV ( $\text{W m}^{-2}$ )                                    | $71.1 \pm 6.1$    | $70.3 \pm 6.2$     | $72.3 \pm 5.7$    | $112.9 \pm 8.7$     | $112.2 \pm 10.3$    | $114.3 \pm 3.6$   | $128.1 \pm 56.6$    | $134.2 \pm 62.3$    | $122 \pm 49.4$      |               |
| Cl <sup>-</sup> ( $\mu\text{g m}^{-3}$ )                    | $5.9 \pm 4.9$     | $3.2 \pm 2.3$      | $9.7 \pm 5.0$     | $2.7 \pm 1.9$       | $1.7 \pm 1.0$       | $4.6 \pm 1.7$     | $2.1 \pm 1.1$       | $1.6 \pm 1.1$       | $2.6 \pm 0.8$       |               |
| Nss-Cl <sup>-</sup> ( $\mu\text{g m}^{-3}$ )                | $5.2 \pm 4.2$     | $2.8 \pm 2.1$      | $8.5 \pm 4.3$     | $2.0 \pm 1.8$       | $1.1 \pm 0.8$       | $3.8 \pm 1.9$     | $1.6 \pm 1.0$       | $1.1 \pm 1.0$       | $2.0 \pm 0.8$       |               |
| NO <sub>3</sub> <sup>-</sup> ( $\mu\text{g m}^{-3}$ )       | $9.2 \pm 6.4$     | $7.7 \pm 7.2$      | $11.3 \pm 4.2$    | $10.8 \pm 14.6$     | $2.6 \pm 1.8$       | $27.1 \pm 15.3$   | $18.9 \pm 7.7$      | $13.0 \pm 5.2$      | $24.8 \pm 4.8$      |               |
| SO <sub>4</sub> <sup>2-</sup> ( $\mu\text{g m}^{-3}$ )      | $11.4 \pm 7.0$    | $7.3 \pm 3.5$      | $17.3 \pm 6.6$    | $7.4 \pm 8.1$       | $2.7 \pm 1.0$       | $16.9 \pm 7.7$    | $9.9 \pm 3.5$       | $8.0 \pm 3.1$       | $11.8 \pm 2.9$      |               |
| NO <sub>3</sub> <sup>-</sup> /SO <sub>4</sub> <sup>2-</sup> | $0.8 \pm 0.4$     | $0.9 \pm 0.5$      | $0.7 \pm 0.2$     | $1.1 \pm 0.5$       | $1.0 \pm 0.4$       | $1.5 \pm 0.4$     | $2.0 \pm 0.7$       | $1.8 \pm 0.9$       | $2.1 \pm 0.3$       |               |
| NH <sub>4</sub> <sup>+</sup> /NO <sub>3</sub> <sup>-</sup>  | $1.0 \pm 0.2$     | $0.9 \pm 0.3$      | $1.1 \pm 0.3$     | $0.7 \pm 0.1$       | $0.7 \pm 0.1$       | $0.6 \pm 0.1$     | $0.5 \pm 0.1$       | $0.5 \pm 0.1$       | $0.4 \pm 0.1$       |               |
| K <sup>+</sup> ( $\mu\text{g m}^{-3}$ )                     | $1.9 \pm 1.3$     | $1.1 \pm 0.7$      | $3.0 \pm 1.3$     | $0.6 \pm 0.5$       | $0.4 \pm 0.3$       | $1.0 \pm 0.5$     | $0.8 \pm 0.3$       | $0.6 \pm 0.2$       | $0.9 \pm 0.2$       |               |
| Nss-K <sup>+</sup> ( $\mu\text{g m}^{-3}$ )                 | $1.9 \pm 1.3$     | $1.1 \pm 0.6$      | $3.0 \pm 1.3$     | $0.6 \pm 0.5$       | $0.4 \pm 0.3$       | $1.0 \pm 0.5$     | $0.8 \pm 0.3$       | $0.6 \pm 0.2$       | $0.9 \pm 0.2$       |               |
| Na <sup>+</sup> ( $\mu\text{g m}^{-3}$ )                    | $0.4 \pm 0.4$     | $0.2 \pm 0.1$      | $0.7 \pm 0.4$     | $0.4 \pm 0.2$       | $0.3 \pm 0.1$       | $0.5 \pm 0.2$     | $0.3 \pm 0.1$       | $0.3 \pm 0.1$       | $0.3 \pm 0.1$       |               |
| Ca <sup>2+</sup> ( $\mu\text{g m}^{-3}$ )                   | $0.9 \pm 0.4$     | $0.7 \pm 0.3$      | $1.2 \pm 0.3$     | $2.3 \pm 0.7$       | $2.7 \pm 0.2$       | $1.6 \pm 0.8$     | $2.2 \pm 1.5$       | $1.9 \pm 1.3$       | $2.4 \pm 1.7$       |               |

|                                                                    |             |             |             |             |              |              |               |               |               |
|--------------------------------------------------------------------|-------------|-------------|-------------|-------------|--------------|--------------|---------------|---------------|---------------|
| NH <sub>4</sub> <sup>+</sup> (μg m <sup>-3</sup> )                 | 8.2 ± 5.5   | 5.3 ± 3.4   | 12.4 ± 5.1  | 6.6 ± 9.1   | 1.7 ± 1.1    | 16.3 ± 10.2  | 8.3 ± 2.9     | 6.2 ± 1.5     | 10.4 ± 2.4    |
| HCOOH (μg m <sup>-3</sup> )                                        | 0.2 ± 0.2   | 0.10 ± 0.07 | 0.43 ± 0.25 | 0.07 ± 0.09 | 0.03 ± 0.04  | 0.14 ± 0.13  | 0.03 ± 0.02   | 0.02 ± 0.01   | 0.04 ± 0.02   |
| CH <sub>3</sub> COOH (μg m <sup>-3</sup> )                         | 0.3 ± 0.2   | 0.18 ± 0.11 | 0.43 ± 0.24 | 0.06 ± 0.07 | 0.04 ± 0.04  | 0.11 ± 0.08  | 0.06 ± 0.04   | 0.07 ± 0.04   | 0.04 ± 0.02   |
| C <sub>2</sub> H <sub>2</sub> O <sub>4</sub> (μg m <sup>-3</sup> ) | 0.4 ± 0.2   | 0.25 ± 0.19 | 0.48 ± 0.10 | 0.21 ± 0.18 | 0.11 ± 0.05  | 0.40 ± 0.18  | 0.2 ± 0.22    | 0.08 ± 0.1    | 0.2 ± 0.3     |
| C <sub>4</sub> H <sub>6</sub> O <sub>4</sub> (μg m <sup>-3</sup> ) | 0.3 ± 0.3   | 0.3 ± 0.3   | 0.2 ± 0.2   | 0.03 ± 0.04 | 0.01 ± 0.01  | 0.06 ± 0.05  | 0.007 ± 0.004 | 0.006 ± 0.005 | 0.008 ± 0.002 |
| C <sub>5</sub> H <sub>8</sub> O <sub>4</sub> (μg m <sup>-3</sup> ) | 0.1 ± 0.04  | 0.02 ± 0.01 | 0.07 ± 0.04 | 0.02 ± 0.01 | 0.01 ± 0.002 | 0.04 ± 0.005 | 0.007 ± 0.008 | 0.005 ± 0.003 | 0.009 ± 0.010 |
| CH <sub>4</sub> O <sub>3</sub> S (μg m <sup>-3</sup> )             | 0.03 ± 0.02 | 0.02 ± 0.02 | 0.04 ± 0.01 | 0.06 ± 0.05 | 0.01 ± 0.001 | 0.07 ± 0.05  | 0.051 ± 0.027 | 0.03 ± 0.02   | 0.07 ± 0.02   |

<sup>a</sup>Aerosol liquid water.

<sup>b</sup>Planetary boundary layer height.

<sup>c</sup>Ventilation coefficient.

**Table S2.** List of molecular formulas for potential isoprene-derived CHON compounds.

| Formula <sup>a</sup>                                          | C | H  | N | O  |
|---------------------------------------------------------------|---|----|---|----|
| C <sub>4</sub> H <sub>7</sub> N <sub>1</sub> O <sub>5</sub>   | 4 | 7  | 1 | 5  |
| C <sub>4</sub> H <sub>7</sub> N <sub>1</sub> O <sub>6</sub>   | 4 | 7  | 1 | 6  |
| C <sub>4</sub> H <sub>7</sub> N <sub>1</sub> O <sub>7</sub>   | 4 | 7  | 1 | 7  |
| C <sub>4</sub> H <sub>9</sub> N <sub>1</sub> O <sub>7</sub>   | 4 | 9  | 1 | 7  |
| C <sub>4</sub> H <sub>7</sub> N <sub>1</sub> O <sub>8</sub>   | 4 | 7  | 1 | 8  |
| C <sub>4</sub> H <sub>7</sub> N <sub>1</sub> O <sub>9</sub>   | 4 | 7  | 1 | 9  |
| C <sub>4</sub> H <sub>6</sub> N <sub>2</sub> O <sub>6</sub>   | 4 | 6  | 2 | 6  |
| C <sub>4</sub> H <sub>6</sub> N <sub>2</sub> O <sub>7</sub>   | 4 | 6  | 2 | 7  |
| C <sub>4</sub> H <sub>8</sub> N <sub>2</sub> O <sub>7</sub>   | 4 | 8  | 2 | 7  |
| C <sub>4</sub> H <sub>6</sub> N <sub>2</sub> O <sub>8</sub>   | 4 | 6  | 2 | 8  |
| C <sub>4</sub> H <sub>8</sub> N <sub>2</sub> O <sub>8</sub>   | 4 | 8  | 2 | 8  |
| C <sub>4</sub> H <sub>7</sub> N <sub>2</sub> O <sub>9</sub>   | 4 | 7  | 2 | 9  |
| C <sub>4</sub> H <sub>8</sub> N <sub>2</sub> O <sub>9</sub>   | 4 | 8  | 2 | 9  |
| C <sub>4</sub> H <sub>8</sub> N <sub>2</sub> O <sub>10</sub>  | 4 | 8  | 2 | 10 |
| C <sub>4</sub> H <sub>7</sub> N <sub>3</sub> O <sub>9</sub>   | 4 | 7  | 3 | 9  |
| C <sub>4</sub> H <sub>7</sub> N <sub>3</sub> O <sub>10</sub>  | 4 | 7  | 3 | 10 |
| C <sub>4</sub> H <sub>7</sub> N <sub>3</sub> O <sub>11</sub>  | 4 | 7  | 3 | 11 |
| C <sub>5</sub> H <sub>7</sub> N <sub>1</sub> O <sub>4</sub>   | 5 | 7  | 1 | 4  |
| C <sub>5</sub> H <sub>9</sub> N <sub>1</sub> O <sub>4</sub>   | 5 | 9  | 1 | 4  |
| C <sub>5</sub> H <sub>7</sub> N <sub>1</sub> O <sub>5</sub>   | 5 | 7  | 1 | 5  |
| C <sub>5</sub> H <sub>9</sub> N <sub>1</sub> O <sub>5</sub>   | 5 | 9  | 1 | 5  |
| C <sub>5</sub> H <sub>7</sub> N <sub>1</sub> O <sub>6</sub>   | 5 | 7  | 1 | 6  |
| C <sub>5</sub> H <sub>9</sub> N <sub>1</sub> O <sub>6</sub>   | 5 | 9  | 1 | 6  |
| C <sub>5</sub> H <sub>11</sub> N <sub>1</sub> O <sub>6</sub>  | 5 | 11 | 1 | 6  |
| C <sub>5</sub> H <sub>7</sub> N <sub>1</sub> O <sub>7</sub>   | 5 | 7  | 1 | 7  |
| C <sub>5</sub> H <sub>9</sub> N <sub>1</sub> O <sub>7</sub>   | 5 | 9  | 1 | 7  |
| C <sub>5</sub> H <sub>11</sub> N <sub>1</sub> O <sub>7</sub>  | 5 | 11 | 1 | 7  |
| C <sub>5</sub> H <sub>7</sub> N <sub>1</sub> O <sub>8</sub>   | 5 | 7  | 1 | 8  |
| C <sub>5</sub> H <sub>8</sub> N <sub>1</sub> O <sub>8</sub>   | 5 | 8  | 1 | 8  |
| C <sub>5</sub> H <sub>9</sub> N <sub>1</sub> O <sub>8</sub>   | 5 | 9  | 1 | 8  |
| C <sub>5</sub> H <sub>11</sub> N <sub>1</sub> O <sub>8</sub>  | 5 | 11 | 1 | 8  |
| C <sub>5</sub> H <sub>7</sub> N <sub>1</sub> O <sub>9</sub>   | 5 | 7  | 1 | 9  |
| C <sub>5</sub> H <sub>8</sub> N <sub>1</sub> O <sub>9</sub>   | 5 | 8  | 1 | 9  |
| C <sub>5</sub> H <sub>9</sub> N <sub>1</sub> O <sub>9</sub>   | 5 | 9  | 1 | 9  |
| C <sub>5</sub> H <sub>11</sub> N <sub>1</sub> O <sub>9</sub>  | 5 | 11 | 1 | 9  |
| C <sub>5</sub> H <sub>13</sub> N <sub>1</sub> O <sub>9</sub>  | 5 | 13 | 1 | 9  |
| C <sub>5</sub> H <sub>8</sub> N <sub>1</sub> O <sub>10</sub>  | 5 | 8  | 1 | 10 |
| C <sub>5</sub> H <sub>9</sub> N <sub>1</sub> O <sub>10</sub>  | 5 | 9  | 1 | 10 |
| C <sub>5</sub> H <sub>11</sub> N <sub>1</sub> O <sub>10</sub> | 5 | 11 | 1 | 10 |
| C <sub>5</sub> H <sub>10</sub> N <sub>1</sub> O <sub>11</sub> | 5 | 10 | 1 | 11 |
| C <sub>5</sub> H <sub>10</sub> N <sub>2</sub> O <sub>6</sub>  | 5 | 10 | 2 | 6  |
| C <sub>5</sub> H <sub>8</sub> N <sub>2</sub> O <sub>7</sub>   | 5 | 8  | 2 | 7  |

|                         |    |    |   |    |
|-------------------------|----|----|---|----|
| $C_5H_{10}N_2O_7$       | 5  | 10 | 2 | 7  |
| $C_5H_6N_2O_8$          | 5  | 6  | 2 | 8  |
| $C_5H_8N_2O_8$          | 5  | 8  | 2 | 8  |
| $C_5H_{10}N_2O_8$       | 5  | 10 | 2 | 8  |
| $C_5H_8N_2O_9$          | 5  | 8  | 2 | 9  |
| $C_5H_9N_2O_9$          | 5  | 9  | 2 | 9  |
| $C_5H_{10}N_2O_9$       | 5  | 10 | 2 | 9  |
| $C_5H_{12}N_2O_9$       | 5  | 12 | 2 | 9  |
| $C_5H_8N_2O_{10}$       | 5  | 8  | 2 | 10 |
| $C_5H_9N_2O_{10}$       | 5  | 9  | 2 | 10 |
| $C_5H_{10}N_2O_{10}$    | 5  | 10 | 2 | 10 |
| $C_5H_{12}N_2O_{10}$    | 5  | 12 | 2 | 10 |
| $C_5H_8N_2O_{11}$       | 5  | 8  | 2 | 11 |
| $C_5H_{10}N_2O_{11}$    | 5  | 10 | 2 | 11 |
| $C_5H_{12}N_2O_{11}$    | 5  | 12 | 2 | 11 |
| $C_5H_9N_3O_9$          | 5  | 9  | 3 | 9  |
| $C_5H_{11}N_3O_9$       | 5  | 11 | 3 | 9  |
| $C_5H_9N_3O_{10}$       | 5  | 9  | 3 | 10 |
| $C_5H_{11}N_3O_{10}$    | 5  | 11 | 3 | 10 |
| $C_5H_9N_3O_{11}$       | 5  | 9  | 3 | 11 |
| $C_5H_{11}N_3O_{11}$    | 5  | 11 | 3 | 11 |
| $C_5H_9N_3O_{12}$       | 5  | 9  | 3 | 12 |
| $C_5H_9N_3O_{13}$       | 5  | 9  | 3 | 13 |
| $C_5H_{11}N_3O_{13}$    | 5  | 11 | 3 | 13 |
| $C_5H_9N_4O_{12}$       | 5  | 9  | 4 | 12 |
| $C_5H_{10}N_4O_{12}$    | 5  | 10 | 4 | 12 |
| $C_5H_{10}N_4O_{13}$    | 5  | 10 | 4 | 13 |
| $C_{10}H_{15}N_1O_{10}$ | 10 | 15 | 1 | 10 |
| $C_{10}H_{16}N_2O_8$    | 10 | 16 | 2 | 8  |
| $C_{10}H_{16}N_2O_9$    | 10 | 16 | 2 | 9  |
| $C_{10}H_{16}N_2O_{10}$ | 10 | 16 | 2 | 10 |
| $C_{10}H_{16}N_2O_{11}$ | 10 | 16 | 2 | 11 |
| $C_{10}H_{18}N_2O_{11}$ | 10 | 18 | 2 | 11 |
| $C_{10}H_{16}N_2O_{12}$ | 10 | 16 | 2 | 12 |
| $C_{10}H_{16}N_2O_{13}$ | 10 | 16 | 2 | 13 |
| $C_{10}H_{16}N_2O_{14}$ | 10 | 16 | 2 | 14 |
| $C_{10}H_{16}N_2O_{15}$ | 10 | 16 | 2 | 15 |
| $C_{10}H_{16}N_2O_{17}$ | 10 | 16 | 2 | 17 |
| $C_{10}H_{17}N_3O_{12}$ | 10 | 17 | 3 | 12 |
| $C_{10}H_{13}N_3O_{13}$ | 10 | 13 | 3 | 13 |
| $C_{10}H_{17}N_3O_{13}$ | 10 | 17 | 3 | 13 |
| $C_{10}H_{15}N_3O_{14}$ | 10 | 15 | 3 | 14 |
| $C_{10}H_{17}N_3O_{14}$ | 10 | 17 | 3 | 14 |

|                         |    |    |   |    |
|-------------------------|----|----|---|----|
| $C_{10}H_{17}N_3O_{15}$ | 10 | 17 | 3 | 15 |
| $C_{10}H_{17}N_3O_{16}$ | 10 | 17 | 3 | 16 |
| $C_{10}H_{17}N_3O_{17}$ | 10 | 17 | 3 | 17 |
| $C_{10}H_{17}N_3O_{18}$ | 10 | 17 | 3 | 18 |
| $C_{10}H_{18}N_4O_{16}$ | 10 | 18 | 4 | 16 |
| $C_{10}H_{18}N_4O_{17}$ | 10 | 18 | 4 | 17 |
| $C_{10}H_{17}N_5O_{18}$ | 10 | 17 | 5 | 18 |
| $C_{15}H_{24}N_4O_{18}$ | 15 | 24 | 4 | 18 |
| $C_{15}H_{24}N_4O_{21}$ | 15 | 24 | 4 | 21 |
| $C_{15}H_{24}N_4O_{22}$ | 15 | 24 | 4 | 22 |
| $C_{15}H_{25}N_5O_{21}$ | 15 | 25 | 5 | 21 |

<sup>a</sup>The molecular formulas were summarized from previous studies (Ng et al., 2008; Guo et al., 2022b; Xu et al., 2021b; Zhao et al., 2021; Tian et al., 2023; Wu et al., 2021).



**Table S3.** List of molecular formulas for potential monoterpene-derived CHON compounds.

| Formula <sup>a</sup>                                          | C | H  | N | O  |
|---------------------------------------------------------------|---|----|---|----|
| C <sub>6</sub> H <sub>7</sub> N <sub>1</sub> O <sub>6</sub>   | 6 | 7  | 1 | 6  |
| C <sub>6</sub> H <sub>7</sub> N <sub>1</sub> O <sub>7</sub>   | 6 | 7  | 1 | 7  |
| C <sub>6</sub> H <sub>7</sub> N <sub>1</sub> O <sub>8</sub>   | 6 | 7  | 1 | 8  |
| C <sub>6</sub> H <sub>9</sub> N <sub>1</sub> O <sub>9</sub>   | 6 | 9  | 1 | 9  |
| C <sub>6</sub> H <sub>7</sub> N <sub>1</sub> O <sub>10</sub>  | 6 | 7  | 1 | 10 |
| C <sub>6</sub> H <sub>7</sub> N <sub>1</sub> O <sub>11</sub>  | 6 | 7  | 1 | 11 |
| C <sub>6</sub> H <sub>6</sub> N <sub>2</sub> O <sub>9</sub>   | 6 | 6  | 2 | 9  |
| C <sub>6</sub> H <sub>10</sub> N <sub>2</sub> O <sub>10</sub> | 6 | 10 | 2 | 10 |
| C <sub>7</sub> H <sub>9</sub> N <sub>1</sub> O <sub>5</sub>   | 7 | 9  | 1 | 5  |
| C <sub>7</sub> H <sub>11</sub> N <sub>1</sub> O <sub>5</sub>  | 7 | 11 | 1 | 5  |
| C <sub>7</sub> H <sub>9</sub> N <sub>1</sub> O <sub>6</sub>   | 7 | 9  | 1 | 6  |
| C <sub>7</sub> H <sub>11</sub> N <sub>1</sub> O <sub>6</sub>  | 7 | 11 | 1 | 6  |
| C <sub>7</sub> H <sub>7</sub> N <sub>1</sub> O <sub>7</sub>   | 7 | 7  | 1 | 7  |
| C <sub>7</sub> H <sub>9</sub> N <sub>1</sub> O <sub>7</sub>   | 7 | 9  | 1 | 7  |
| C <sub>7</sub> H <sub>11</sub> N <sub>1</sub> O <sub>7</sub>  | 7 | 11 | 1 | 7  |
| C <sub>7</sub> H <sub>7</sub> N <sub>1</sub> O <sub>8</sub>   | 7 | 7  | 1 | 8  |
| C <sub>7</sub> H <sub>8</sub> N <sub>1</sub> O <sub>8</sub>   | 7 | 8  | 1 | 8  |
| C <sub>7</sub> H <sub>9</sub> N <sub>1</sub> O <sub>8</sub>   | 7 | 9  | 1 | 8  |
| C <sub>7</sub> H <sub>10</sub> N <sub>1</sub> O <sub>8</sub>  | 7 | 10 | 1 | 8  |
| C <sub>7</sub> H <sub>11</sub> N <sub>1</sub> O <sub>8</sub>  | 7 | 11 | 1 | 8  |
| C <sub>7</sub> H <sub>9</sub> N <sub>1</sub> O <sub>9</sub>   | 7 | 9  | 1 | 9  |
| C <sub>7</sub> H <sub>10</sub> N <sub>1</sub> O <sub>9</sub>  | 7 | 10 | 1 | 9  |
| C <sub>7</sub> H <sub>11</sub> N <sub>1</sub> O <sub>9</sub>  | 7 | 11 | 1 | 9  |
| C <sub>7</sub> H <sub>9</sub> N <sub>1</sub> O <sub>10</sub>  | 7 | 9  | 1 | 10 |
| C <sub>7</sub> H <sub>10</sub> N <sub>1</sub> O <sub>10</sub> | 7 | 10 | 1 | 10 |
| C <sub>7</sub> H <sub>11</sub> N <sub>1</sub> O <sub>10</sub> | 7 | 11 | 1 | 10 |
| C <sub>7</sub> H <sub>9</sub> N <sub>1</sub> O <sub>11</sub>  | 7 | 9  | 1 | 11 |
| C <sub>7</sub> H <sub>10</sub> N <sub>1</sub> O <sub>11</sub> | 7 | 10 | 1 | 11 |
| C <sub>7</sub> H <sub>11</sub> N <sub>1</sub> O <sub>11</sub> | 7 | 11 | 1 | 11 |
| C <sub>7</sub> H <sub>9</sub> N <sub>1</sub> O <sub>12</sub>  | 7 | 9  | 1 | 12 |
| C <sub>7</sub> H <sub>10</sub> N <sub>1</sub> O <sub>12</sub> | 7 | 10 | 1 | 12 |
| C <sub>7</sub> H <sub>11</sub> N <sub>1</sub> O <sub>12</sub> | 7 | 11 | 1 | 12 |
| C <sub>7</sub> H <sub>11</sub> N <sub>1</sub> O <sub>15</sub> | 7 | 11 | 1 | 15 |
| C <sub>7</sub> H <sub>8</sub> N <sub>2</sub> O <sub>8</sub>   | 7 | 8  | 2 | 8  |
| C <sub>7</sub> H <sub>8</sub> N <sub>2</sub> O <sub>10</sub>  | 7 | 8  | 2 | 10 |
| C <sub>7</sub> H <sub>8</sub> N <sub>2</sub> O <sub>11</sub>  | 7 | 8  | 2 | 11 |
| C <sub>7</sub> H <sub>8</sub> N <sub>2</sub> O <sub>12</sub>  | 7 | 8  | 2 | 12 |
| C <sub>7</sub> H <sub>8</sub> N <sub>2</sub> O <sub>13</sub>  | 7 | 8  | 2 | 13 |
| C <sub>7</sub> H <sub>8</sub> N <sub>2</sub> O <sub>14</sub>  | 7 | 8  | 2 | 14 |
| C <sub>7</sub> H <sub>10</sub> N <sub>2</sub> O <sub>14</sub> | 7 | 10 | 2 | 14 |
| C <sub>8</sub> H <sub>13</sub> N <sub>1</sub> O <sub>5</sub>  | 8 | 13 | 1 | 5  |

|                      |   |    |   |    |
|----------------------|---|----|---|----|
| $C_8H_{17}N_1O_5$    | 8 | 17 | 1 | 5  |
| $C_8H_{11}N_1O_6$    | 8 | 11 | 1 | 6  |
| $C_8H_{11}N_1O_7$    | 8 | 11 | 1 | 7  |
| $C_8H_{12}N_1O_7$    | 8 | 12 | 1 | 7  |
| $C_8H_{11}N_1O_8$    | 8 | 11 | 1 | 8  |
| $C_8H_{12}N_1O_8$    | 8 | 12 | 1 | 8  |
| $C_8H_{13}N_1O_8$    | 8 | 13 | 1 | 8  |
| $C_8H_{15}N_1O_8$    | 8 | 15 | 1 | 8  |
| $C_8H_{11}N_1O_9$    | 8 | 11 | 1 | 9  |
| $C_8H_{12}N_1O_9$    | 8 | 12 | 1 | 9  |
| $C_8H_{13}N_1O_9$    | 8 | 13 | 1 | 9  |
| $C_8H_{11}N_1O_{10}$ | 8 | 11 | 1 | 10 |
| $C_8H_{12}N_1O_{10}$ | 8 | 12 | 1 | 10 |
| $C_8H_{13}N_1O_{10}$ | 8 | 13 | 1 | 10 |
| $C_8H_{11}N_1O_{11}$ | 8 | 11 | 1 | 11 |
| $C_8H_{12}N_1O_{11}$ | 8 | 12 | 1 | 11 |
| $C_8H_{13}N_1O_{11}$ | 8 | 13 | 1 | 11 |
| $C_8H_{11}N_1O_{12}$ | 8 | 11 | 1 | 12 |
| $C_8H_{12}N_1O_{12}$ | 8 | 12 | 1 | 12 |
| $C_8H_{13}N_1O_{12}$ | 8 | 13 | 1 | 12 |
| $C_8H_{11}N_1O_{13}$ | 8 | 11 | 1 | 13 |
| $C_8H_{10}N_2O_8$    | 8 | 10 | 2 | 8  |
| $C_8H_{10}N_2O_{14}$ | 8 | 10 | 2 | 14 |
| $C_9H_{11}N_1O_2$    | 9 | 11 | 1 | 2  |
| $C_9H_{13}N_1O_2$    | 9 | 13 | 1 | 2  |
| $C_9H_{17}N_1O_3$    | 9 | 17 | 1 | 3  |
| $C_9H_{13}N_1O_4$    | 9 | 13 | 1 | 4  |
| $C_9H_{14}N_1O_4$    | 9 | 14 | 1 | 4  |
| $C_9H_{15}N_1O_4$    | 9 | 15 | 1 | 4  |
| $C_9H_{11}N_1O_5$    | 9 | 11 | 1 | 5  |
| $C_9H_{13}N_1O_5$    | 9 | 13 | 1 | 5  |
| $C_9H_{12}N_1O_6$    | 9 | 12 | 1 | 6  |
| $C_9H_{13}N_1O_6$    | 9 | 13 | 1 | 6  |
| $C_9H_{16}N_1O_6$    | 9 | 16 | 1 | 6  |
| $C_9H_{13}N_1O_7$    | 9 | 13 | 1 | 7  |
| $C_9H_{14}N_1O_7$    | 9 | 14 | 1 | 7  |
| $C_9H_{15}N_1O_7$    | 9 | 15 | 1 | 7  |
| $C_9H_{13}N_1O_8$    | 9 | 13 | 1 | 8  |
| $C_9H_{14}N_1O_8$    | 9 | 14 | 1 | 8  |
| $C_9H_{15}N_1O_8$    | 9 | 15 | 1 | 8  |
| $C_9H_{16}N_1O_8$    | 9 | 16 | 1 | 8  |
| $C_9H_{13}N_1O_9$    | 9 | 13 | 1 | 9  |
| $C_9H_{14}N_1O_9$    | 9 | 14 | 1 | 9  |
| $C_9H_{15}N_1O_9$    | 9 | 15 | 1 | 9  |

|                      |    |    |   |    |
|----------------------|----|----|---|----|
| $C_9H_{13}N_1O_{10}$ | 9  | 13 | 1 | 10 |
| $C_9H_{14}N_1O_{10}$ | 9  | 14 | 1 | 10 |
| $C_9H_{15}N_1O_{10}$ | 9  | 15 | 1 | 10 |
| $C_9H_{13}N_1O_{11}$ | 9  | 13 | 1 | 11 |
| $C_9H_{14}N_1O_{11}$ | 9  | 14 | 1 | 11 |
| $C_9H_{15}N_1O_{11}$ | 9  | 15 | 1 | 11 |
| $C_9H_{13}N_1O_{12}$ | 9  | 13 | 1 | 12 |
| $C_9H_{14}N_1O_{12}$ | 9  | 14 | 1 | 12 |
| $C_9H_{15}N_1O_{12}$ | 9  | 15 | 1 | 12 |
| $C_9H_{13}N_1O_{13}$ | 9  | 13 | 1 | 13 |
| $C_9H_{14}N_1O_{13}$ | 9  | 14 | 1 | 13 |
| $C_9H_{15}N_1O_{13}$ | 9  | 15 | 1 | 13 |
| $C_9H_{13}N_1O_{14}$ | 9  | 13 | 1 | 14 |
| $C_9H_{14}N_1O_{14}$ | 9  | 14 | 1 | 14 |
| $C_9H_{15}N_1O_{14}$ | 9  | 15 | 1 | 14 |
| $C_9H_{13}N_2O_7$    | 9  | 13 | 2 | 7  |
| $C_9H_{14}N_2O_8$    | 9  | 14 | 2 | 8  |
| $C_9H_{10}N_2O_9$    | 9  | 10 | 2 | 9  |
| $C_9H_{11}N_2O_9$    | 9  | 11 | 2 | 9  |
| $C_9H_{12}N_2O_9$    | 9  | 12 | 2 | 9  |
| $C_9H_{10}N_2O_{10}$ | 9  | 10 | 2 | 10 |
| $C_9H_{11}N_2O_{10}$ | 9  | 11 | 2 | 10 |
| $C_9H_{12}N_2O_{10}$ | 9  | 12 | 2 | 10 |
| $C_9H_{10}N_2O_{11}$ | 9  | 10 | 2 | 11 |
| $C_9H_{11}N_2O_{11}$ | 9  | 11 | 2 | 11 |
| $C_9H_{12}N_2O_{11}$ | 9  | 12 | 2 | 11 |
| $C_9H_{10}N_2O_{12}$ | 9  | 10 | 2 | 12 |
| $C_9H_{11}N_2O_{12}$ | 9  | 11 | 2 | 12 |
| $C_9H_{12}N_2O_{12}$ | 9  | 12 | 2 | 12 |
| $C_9H_{14}N_2O_{12}$ | 9  | 14 | 2 | 12 |
| $C_{10}H_{15}N_1O_3$ | 10 | 15 | 1 | 3  |
| $C_{10}H_{17}N_1O_3$ | 10 | 17 | 1 | 3  |
| $C_{10}H_{15}N_1O_4$ | 10 | 15 | 1 | 4  |
| $C_{10}H_{17}N_1O_4$ | 10 | 17 | 1 | 4  |
| $C_{10}H_{19}N_1O_4$ | 10 | 19 | 1 | 4  |
| $C_{10}H_{15}N_1O_5$ | 10 | 15 | 1 | 5  |
| $C_{10}H_{17}N_1O_5$ | 10 | 17 | 1 | 5  |
| $C_{10}H_{13}N_1O_6$ | 10 | 13 | 1 | 6  |
| $C_{10}H_{15}N_1O_6$ | 10 | 15 | 1 | 6  |
| $C_{10}H_{16}N_1O_6$ | 10 | 16 | 1 | 6  |
| $C_{10}H_{17}N_1O_6$ | 10 | 17 | 1 | 6  |
| $C_{10}H_{13}N_1O_7$ | 10 | 13 | 1 | 7  |
| $C_{10}H_{15}N_1O_7$ | 10 | 15 | 1 | 7  |
| $C_{10}H_{16}N_1O_7$ | 10 | 16 | 1 | 7  |

---

|                         |    |    |   |    |
|-------------------------|----|----|---|----|
| $C_{10}H_{17}N_1O_7$    | 10 | 17 | 1 | 7  |
| $C_{10}H_{13}N_1O_8$    | 10 | 13 | 1 | 8  |
| $C_{10}H_{15}N_1O_8$    | 10 | 15 | 1 | 8  |
| $C_{10}H_{16}N_1O_8$    | 10 | 16 | 1 | 8  |
| $C_{10}H_{17}N_1O_8$    | 10 | 17 | 1 | 8  |
| $C_{10}H_{13}N_1O_9$    | 10 | 13 | 1 | 9  |
| $C_{10}H_{15}N_1O_9$    | 10 | 15 | 1 | 9  |
| $C_{10}H_{16}N_1O_9$    | 10 | 16 | 1 | 9  |
| $C_{10}H_{17}N_1O_9$    | 10 | 17 | 1 | 9  |
| $C_{10}H_{15}N_1O_{10}$ | 10 | 15 | 1 | 10 |
| $C_{10}H_{16}N_1O_{10}$ | 10 | 16 | 1 | 10 |
| $C_{10}H_{17}N_1O_{10}$ | 10 | 17 | 1 | 10 |
| $C_{10}H_{15}N_1O_{11}$ | 10 | 15 | 1 | 11 |
| $C_{10}H_{16}N_1O_{11}$ | 10 | 16 | 1 | 11 |
| $C_{10}H_{17}N_1O_{11}$ | 10 | 17 | 1 | 11 |
| $C_{10}H_{18}N_1O_{11}$ | 10 | 18 | 1 | 11 |
| $C_{10}H_{15}N_1O_{12}$ | 10 | 15 | 1 | 12 |
| $C_{10}H_{16}N_1O_{12}$ | 10 | 16 | 1 | 12 |
| $C_{10}H_{17}N_1O_{12}$ | 10 | 17 | 1 | 12 |
| $C_{10}H_{15}N_1O_{13}$ | 10 | 15 | 1 | 13 |
| $C_{10}H_{16}N_1O_{13}$ | 10 | 16 | 1 | 13 |
| $C_{10}H_{17}N_1O_{13}$ | 10 | 17 | 1 | 13 |
| $C_{10}H_{15}N_1O_{14}$ | 10 | 15 | 1 | 14 |
| $C_{10}H_{16}N_1O_{14}$ | 10 | 16 | 1 | 14 |
| $C_{10}H_{17}N_1O_{14}$ | 10 | 17 | 1 | 14 |
| $C_{10}H_{15}N_1O_{15}$ | 10 | 15 | 1 | 15 |
| $C_{10}H_{16}N_1O_{15}$ | 10 | 16 | 1 | 15 |
| $C_{10}H_{17}N_1O_{15}$ | 10 | 17 | 1 | 15 |
| $C_{10}H_{12}N_2O_5$    | 10 | 12 | 2 | 5  |
| $C_{10}H_{20}N_2O_6$    | 10 | 20 | 2 | 6  |
| $C_{10}H_{12}N_2O_8$    | 10 | 12 | 2 | 8  |
| $C_{10}H_{14}N_2O_8$    | 10 | 14 | 2 | 8  |
| $C_{10}H_{15}N_2O_8$    | 10 | 15 | 2 | 8  |
| $C_{10}H_{16}N_2O_8$    | 10 | 16 | 2 | 8  |
| $C_{10}H_{18}N_2O_8$    | 10 | 18 | 2 | 8  |
| $C_{10}H_{12}N_2O_9$    | 10 | 12 | 2 | 9  |
| $C_{10}H_{14}N_2O_9$    | 10 | 14 | 2 | 9  |
| $C_{10}H_{15}N_2O_9$    | 10 | 15 | 2 | 9  |
| $C_{10}H_{16}N_2O_9$    | 10 | 16 | 2 | 9  |
| $C_{10}H_{18}N_2O_9$    | 10 | 18 | 2 | 9  |
| $C_{10}H_{12}N_2O_{10}$ | 10 | 12 | 2 | 10 |
| $C_{10}H_{14}N_2O_{10}$ | 10 | 14 | 2 | 10 |
| $C_{10}H_{15}N_2O_{10}$ | 10 | 15 | 2 | 10 |
| $C_{10}H_{16}N_2O_{10}$ | 10 | 16 | 2 | 10 |

---

|                         |    |    |   |    |
|-------------------------|----|----|---|----|
| $C_{10}H_{14}N_2O_{11}$ | 10 | 14 | 2 | 11 |
| $C_{10}H_{15}N_2O_{11}$ | 10 | 15 | 2 | 11 |
| $C_{10}H_{16}N_2O_{11}$ | 10 | 16 | 2 | 11 |
| $C_{10}H_{14}N_2O_{12}$ | 10 | 14 | 2 | 12 |
| $C_{10}H_{15}N_2O_{12}$ | 10 | 15 | 2 | 12 |
| $C_{10}H_{16}N_2O_{12}$ | 10 | 16 | 2 | 12 |
| $C_{10}H_{17}N_2O_{12}$ | 10 | 17 | 2 | 12 |
| $C_{10}H_{14}N_2O_{13}$ | 10 | 14 | 2 | 13 |
| $C_{10}H_{15}N_2O_{13}$ | 10 | 15 | 2 | 13 |
| $C_{10}H_{16}N_2O_{13}$ | 10 | 16 | 2 | 13 |
| $C_{10}H_{18}N_2O_{13}$ | 10 | 18 | 2 | 13 |
| $C_{10}H_{14}N_2O_{14}$ | 10 | 14 | 2 | 14 |
| $C_{10}H_{15}N_2O_{14}$ | 10 | 15 | 2 | 14 |
| $C_{10}H_{16}N_2O_{14}$ | 10 | 16 | 2 | 14 |
| $C_{10}H_{18}N_2O_{14}$ | 10 | 18 | 2 | 14 |
| $C_{10}H_{14}N_2O_{15}$ | 10 | 14 | 2 | 15 |
| $C_{10}H_{15}N_2O_{15}$ | 10 | 15 | 2 | 15 |
| $C_{10}H_{16}N_2O_{15}$ | 10 | 16 | 2 | 15 |
| $C_{10}H_{14}N_2O_{16}$ | 10 | 14 | 2 | 16 |
| $C_{10}H_{15}N_2O_{16}$ | 10 | 15 | 2 | 16 |
| $C_{10}H_{16}N_2O_{16}$ | 10 | 16 | 2 | 16 |
| $C_{10}H_{15}N_3O_{11}$ | 10 | 15 | 3 | 11 |
| $C_{10}H_{17}N_3O_{12}$ | 10 | 17 | 3 | 12 |
| $C_{10}H_{15}N_3O_{13}$ | 10 | 15 | 3 | 13 |
| $C_{10}H_{17}N_3O_{13}$ | 10 | 17 | 3 | 13 |
| $C_{10}H_{15}N_3O_{14}$ | 10 | 15 | 3 | 14 |
| $C_{10}H_{17}N_3O_{14}$ | 10 | 17 | 3 | 14 |
| $C_{10}H_{15}N_3O_{15}$ | 10 | 15 | 3 | 15 |
| $C_{10}H_{17}N_3O_{15}$ | 10 | 17 | 3 | 15 |
| $C_{10}H_{17}N_3O_{16}$ | 10 | 17 | 3 | 16 |
| $C_{11}H_{23}N_1O_3$    | 11 | 23 | 1 | 3  |
| $C_{11}H_{17}N_1O_5$    | 11 | 17 | 1 | 5  |
| $C_{11}H_{20}N_2O_5$    | 11 | 20 | 2 | 5  |
| $C_{11}H_{18}N_2O_{10}$ | 11 | 18 | 2 | 10 |
| $C_{12}H_{23}N_1O_3$    | 12 | 23 | 1 | 3  |
| $C_{13}H_{25}N_1O_2$    | 13 | 25 | 1 | 2  |
| $C_{13}H_{26}N_1O_{12}$ | 13 | 26 | 1 | 12 |
| $C_{14}H_{26}N_1O_{10}$ | 14 | 26 | 1 | 10 |
| $C_{14}H_{24}N_2O_5$    | 14 | 24 | 2 | 5  |
| $C_{15}H_{30}N_1O_{14}$ | 15 | 30 | 1 | 14 |
| $C_{16}H_{35}N_1O_3$    | 16 | 35 | 1 | 3  |
| $C_{16}H_{32}N_1O_{13}$ | 16 | 32 | 1 | 13 |
| $C_{16}H_{32}N_1O_{14}$ | 16 | 32 | 1 | 14 |
| $C_{16}H_{32}N_1O_{15}$ | 16 | 32 | 1 | 15 |

|                                                                |    |    |   |    |
|----------------------------------------------------------------|----|----|---|----|
| C <sub>17</sub> H <sub>22</sub> N <sub>1</sub> O <sub>6</sub>  | 17 | 22 | 1 | 6  |
| C <sub>17</sub> H <sub>28</sub> N <sub>1</sub> O <sub>9</sub>  | 17 | 28 | 1 | 9  |
| C <sub>17</sub> H <sub>27</sub> N <sub>1</sub> O <sub>12</sub> | 17 | 27 | 1 | 12 |
| C <sub>17</sub> H <sub>32</sub> N <sub>1</sub> O <sub>13</sub> | 17 | 32 | 1 | 13 |
| C <sub>17</sub> H <sub>34</sub> N <sub>1</sub> O <sub>13</sub> | 17 | 34 | 1 | 13 |
| C <sub>17</sub> H <sub>34</sub> N <sub>1</sub> O <sub>14</sub> | 17 | 34 | 1 | 14 |
| C <sub>17</sub> H <sub>27</sub> N <sub>1</sub> O <sub>15</sub> | 17 | 27 | 1 | 15 |
| C <sub>17</sub> H <sub>34</sub> N <sub>1</sub> O <sub>15</sub> | 17 | 34 | 1 | 15 |
| C <sub>17</sub> H <sub>28</sub> N <sub>2</sub> O <sub>9</sub>  | 17 | 28 | 2 | 9  |
| C <sub>17</sub> H <sub>26</sub> N <sub>2</sub> O <sub>12</sub> | 17 | 26 | 2 | 12 |
| C <sub>17</sub> H <sub>26</sub> N <sub>2</sub> O <sub>13</sub> | 17 | 26 | 2 | 13 |
| C <sub>17</sub> H <sub>28</sub> N <sub>2</sub> O <sub>13</sub> | 17 | 28 | 2 | 13 |
| C <sub>17</sub> H <sub>26</sub> N <sub>2</sub> O <sub>14</sub> | 17 | 26 | 2 | 14 |
| C <sub>17</sub> H <sub>26</sub> N <sub>2</sub> O <sub>15</sub> | 17 | 26 | 2 | 15 |
| C <sub>17</sub> H <sub>26</sub> N <sub>2</sub> O <sub>16</sub> | 17 | 26 | 2 | 16 |
| C <sub>17</sub> H <sub>26</sub> N <sub>2</sub> O <sub>17</sub> | 17 | 26 | 2 | 17 |
| C <sub>17</sub> H <sub>26</sub> N <sub>2</sub> O <sub>18</sub> | 17 | 26 | 2 | 18 |
| C <sub>18</sub> H <sub>27</sub> N <sub>1</sub> O <sub>5</sub>  | 18 | 27 | 1 | 5  |
| C <sub>18</sub> H <sub>31</sub> N <sub>1</sub> O <sub>7</sub>  | 18 | 31 | 1 | 7  |
| C <sub>18</sub> H <sub>31</sub> N <sub>1</sub> O <sub>8</sub>  | 18 | 31 | 1 | 8  |
| C <sub>18</sub> H <sub>27</sub> N <sub>1</sub> O <sub>10</sub> | 18 | 27 | 1 | 10 |
| C <sub>18</sub> H <sub>28</sub> N <sub>1</sub> O <sub>13</sub> | 18 | 28 | 1 | 13 |
| C <sub>18</sub> H <sub>32</sub> N <sub>1</sub> O <sub>14</sub> | 18 | 32 | 1 | 14 |
| C <sub>18</sub> H <sub>34</sub> N <sub>1</sub> O <sub>14</sub> | 18 | 34 | 1 | 14 |
| C <sub>18</sub> H <sub>36</sub> N <sub>1</sub> O <sub>14</sub> | 18 | 36 | 1 | 14 |
| C <sub>18</sub> H <sub>29</sub> N <sub>1</sub> O <sub>15</sub> | 18 | 29 | 1 | 15 |
| C <sub>18</sub> H <sub>34</sub> N <sub>1</sub> O <sub>15</sub> | 18 | 34 | 1 | 15 |
| C <sub>18</sub> H <sub>36</sub> N <sub>1</sub> O <sub>15</sub> | 18 | 36 | 1 | 15 |
| C <sub>18</sub> H <sub>35</sub> N <sub>1</sub> O               | 18 | 35 | 1 | 1  |
| C <sub>18</sub> H <sub>34</sub> N <sub>2</sub> O <sub>5</sub>  | 18 | 34 | 2 | 5  |
| C <sub>18</sub> H <sub>30</sub> N <sub>2</sub> O <sub>7</sub>  | 18 | 30 | 2 | 7  |
| C <sub>18</sub> H <sub>28</sub> N <sub>2</sub> O <sub>11</sub> | 18 | 28 | 2 | 11 |
| C <sub>18</sub> H <sub>28</sub> N <sub>2</sub> O <sub>12</sub> | 18 | 28 | 2 | 12 |
| C <sub>18</sub> H <sub>29</sub> N <sub>3</sub> O <sub>13</sub> | 18 | 29 | 3 | 13 |
| C <sub>18</sub> H <sub>29</sub> N <sub>3</sub> O <sub>14</sub> | 18 | 29 | 3 | 14 |
| C <sub>19</sub> H <sub>41</sub> N <sub>1</sub> O <sub>2</sub>  | 19 | 41 | 1 | 2  |
| C <sub>19</sub> H <sub>38</sub> N <sub>1</sub> O <sub>3</sub>  | 19 | 38 | 1 | 3  |
| C <sub>19</sub> H <sub>29</sub> N <sub>1</sub> O <sub>4</sub>  | 19 | 29 | 1 | 4  |
| C <sub>19</sub> H <sub>29</sub> N <sub>1</sub> O <sub>5</sub>  | 19 | 29 | 1 | 5  |
| C <sub>19</sub> H <sub>33</sub> N <sub>1</sub> O <sub>5</sub>  | 19 | 33 | 1 | 5  |
| C <sub>19</sub> H <sub>29</sub> N <sub>1</sub> O <sub>6</sub>  | 19 | 29 | 1 | 6  |
| C <sub>19</sub> H <sub>33</sub> N <sub>1</sub> O <sub>6</sub>  | 19 | 33 | 1 | 6  |
| C <sub>19</sub> H <sub>31</sub> N <sub>1</sub> O <sub>7</sub>  | 19 | 31 | 1 | 7  |
| C <sub>19</sub> H <sub>33</sub> N <sub>1</sub> O <sub>7</sub>  | 19 | 33 | 1 | 7  |

|                         |    |    |   |    |
|-------------------------|----|----|---|----|
| $C_{19}H_{35}N_1O_7$    | 19 | 35 | 1 | 7  |
| $C_{19}H_{33}N_1O_8$    | 19 | 33 | 1 | 8  |
| $C_{19}H_{35}N_1O_8$    | 19 | 35 | 1 | 8  |
| $C_{19}H_{29}N_1O_{10}$ | 19 | 29 | 1 | 10 |
| $C_{19}H_{31}N_1O_{10}$ | 19 | 31 | 1 | 10 |
| $C_{19}H_{29}N_1O_{11}$ | 19 | 29 | 1 | 11 |
| $C_{19}H_{31}N_1O_{11}$ | 19 | 31 | 1 | 11 |
| $C_{19}H_{29}N_1O_{12}$ | 19 | 29 | 1 | 12 |
| $C_{19}H_{31}N_1O_{12}$ | 19 | 31 | 1 | 12 |
| $C_{19}H_{29}N_1O_{13}$ | 19 | 29 | 1 | 13 |
| $C_{19}H_{31}N_1O_{13}$ | 19 | 31 | 1 | 13 |
| $C_{19}H_{31}N_1O_{14}$ | 19 | 31 | 1 | 14 |
| $C_{19}H_{38}N_1O_{14}$ | 19 | 38 | 1 | 14 |
| $C_{19}H_{31}N_1O_{15}$ | 19 | 31 | 1 | 15 |
| $C_{19}H_{38}N_1O_{15}$ | 19 | 38 | 1 | 15 |
| $C_{19}H_{38}N_1O_{16}$ | 19 | 38 | 1 | 16 |
| $C_{19}H_{30}N_1O_{17}$ | 19 | 30 | 1 | 17 |
| $C_{19}H_{36}N_1O_{17}$ | 19 | 36 | 1 | 17 |
| $C_{19}H_{24}N_2O_2$    | 19 | 24 | 2 | 2  |
| $C_{19}H_{34}N_2O_8$    | 19 | 34 | 2 | 8  |
| $C_{19}H_{30}N_2O_{10}$ | 19 | 30 | 2 | 10 |
| $C_{19}H_{30}N_2O_{11}$ | 19 | 30 | 2 | 11 |
| $C_{19}H_{30}N_2O_{12}$ | 19 | 30 | 2 | 12 |
| $C_{19}H_{30}N_2O_{13}$ | 19 | 30 | 2 | 13 |
| $C_{19}H_{30}N_2O_{14}$ | 19 | 30 | 2 | 14 |
| $C_{19}H_{32}N_2O_{14}$ | 19 | 32 | 2 | 14 |
| $C_{19}H_{30}N_2O_{15}$ | 19 | 30 | 2 | 15 |
| $C_{19}H_{30}N_2O_{16}$ | 19 | 30 | 2 | 16 |
| $C_{19}H_{30}N_2O_{17}$ | 19 | 30 | 2 | 17 |
| $C_{19}H_{30}N_2O_{18}$ | 19 | 30 | 2 | 18 |
| $C_{19}H_{30}N_2O_{19}$ | 19 | 30 | 2 | 19 |
| $C_{19}H_{31}N_3O_{15}$ | 19 | 31 | 3 | 15 |
| $C_{19}H_{31}N_3O_{16}$ | 19 | 31 | 3 | 16 |
| $C_{19}H_{31}N_3O_{17}$ | 19 | 31 | 3 | 17 |
| $C_{19}H_{31}N_3O_{18}$ | 19 | 31 | 3 | 18 |
| $C_{19}H_{31}N_3O_{19}$ | 19 | 31 | 3 | 19 |
| $C_{19}H_{30}N_4O_{13}$ | 19 | 30 | 4 | 13 |
| $C_{19}H_{30}N_4O_{15}$ | 19 | 30 | 4 | 15 |
| $C_{19}H_{31}N_5O_{17}$ | 19 | 31 | 5 | 17 |
| $C_{19}H_{31}N_5O_{18}$ | 19 | 31 | 5 | 18 |
| $C_{19}H_{31}N_5O_{19}$ | 19 | 31 | 5 | 19 |
| $C_{20}H_{31}N_1O_4$    | 20 | 31 | 1 | 4  |
| $C_{20}H_{31}N_1O_5$    | 20 | 31 | 1 | 5  |
| $C_{20}H_{35}N_1O_5$    | 20 | 35 | 1 | 5  |

|                         |    |    |   |    |
|-------------------------|----|----|---|----|
| $C_{20}H_{31}N_1O_6$    | 20 | 31 | 1 | 6  |
| $C_{20}H_{33}N_1O_6$    | 20 | 33 | 1 | 6  |
| $C_{20}H_{35}N_1O_6$    | 20 | 35 | 1 | 6  |
| $C_{20}H_{31}N_1O_7$    | 20 | 31 | 1 | 7  |
| $C_{20}H_{33}N_1O_7$    | 20 | 33 | 1 | 7  |
| $C_{20}H_{35}N_1O_7$    | 20 | 35 | 1 | 7  |
| $C_{20}H_{37}N_1O_7$    | 20 | 37 | 1 | 7  |
| $C_{20}H_{31}N_1O_8$    | 20 | 31 | 1 | 8  |
| $C_{20}H_{33}N_1O_8$    | 20 | 33 | 1 | 8  |
| $C_{20}H_{31}N_1O_9$    | 20 | 31 | 1 | 9  |
| $C_{20}H_{33}N_1O_9$    | 20 | 33 | 1 | 9  |
| $C_{20}H_{39}N_1O_9$    | 20 | 39 | 1 | 9  |
| $C_{20}H_{31}N_1O_{10}$ | 20 | 31 | 1 | 10 |
| $C_{20}H_{31}N_1O_{11}$ | 20 | 31 | 1 | 11 |
| $C_{20}H_{31}N_1O_{12}$ | 20 | 31 | 1 | 12 |
| $C_{20}H_{33}N_1O_{12}$ | 20 | 33 | 1 | 12 |
| $C_{20}H_{31}N_1O_{13}$ | 20 | 31 | 1 | 13 |
| $C_{20}H_{40}N_1O_{14}$ | 20 | 40 | 1 | 14 |
| $C_{20}H_{31}N_1O_{15}$ | 20 | 31 | 1 | 15 |
| $C_{20}H_{33}N_1O_{15}$ | 20 | 33 | 1 | 15 |
| $C_{20}H_{38}N_1O_{15}$ | 20 | 38 | 1 | 15 |
| $C_{20}H_{40}N_1O_{15}$ | 20 | 40 | 1 | 15 |
| $C_{20}H_{33}N_1O_{16}$ | 20 | 33 | 1 | 16 |
| $C_{20}H_{38}N_1O_{16}$ | 20 | 38 | 1 | 16 |
| $C_{20}H_{40}N_1O_{16}$ | 20 | 40 | 1 | 16 |
| $C_{20}H_{32}N_2O_8$    | 20 | 32 | 2 | 8  |
| $C_{20}H_{34}N_2O_8$    | 20 | 34 | 2 | 8  |
| $C_{20}H_{30}N_2O_9$    | 20 | 30 | 2 | 9  |
| $C_{20}H_{32}N_2O_9$    | 20 | 32 | 2 | 9  |
| $C_{20}H_{32}N_2O_{10}$ | 20 | 32 | 2 | 10 |
| $C_{20}H_{32}N_2O_{11}$ | 20 | 32 | 2 | 11 |
| $C_{20}H_{34}N_2O_{11}$ | 20 | 34 | 2 | 11 |
| $C_{20}H_{30}N_2O_{12}$ | 20 | 30 | 2 | 12 |
| $C_{20}H_{32}N_2O_{12}$ | 20 | 32 | 2 | 12 |
| $C_{20}H_{30}N_2O_{13}$ | 20 | 30 | 2 | 13 |
| $C_{20}H_{31}N_2O_{13}$ | 20 | 31 | 2 | 13 |
| $C_{20}H_{32}N_2O_{13}$ | 20 | 32 | 2 | 13 |
| $C_{20}H_{30}N_2O_{14}$ | 20 | 30 | 2 | 14 |
| $C_{20}H_{31}N_2O_{14}$ | 20 | 31 | 2 | 14 |
| $C_{20}H_{32}N_2O_{14}$ | 20 | 32 | 2 | 14 |
| $C_{20}H_{30}N_2O_{15}$ | 20 | 30 | 2 | 15 |
| $C_{20}H_{31}N_2O_{15}$ | 20 | 31 | 2 | 15 |
| $C_{20}H_{32}N_2O_{15}$ | 20 | 32 | 2 | 15 |
| $C_{20}H_{30}N_2O_{16}$ | 20 | 30 | 2 | 16 |



|                         |    |    |   |    |
|-------------------------|----|----|---|----|
| $C_{20}H_{31}N_2O_{16}$ | 20 | 31 | 2 | 16 |
| $C_{20}H_{32}N_2O_{16}$ | 20 | 32 | 2 | 16 |
| $C_{20}H_{30}N_2O_{17}$ | 20 | 30 | 2 | 17 |
| $C_{20}H_{32}N_2O_{17}$ | 20 | 32 | 2 | 17 |
| $C_{20}H_{32}N_2O_{18}$ | 20 | 32 | 2 | 18 |
| $C_{20}H_{32}N_2O_{19}$ | 20 | 32 | 2 | 19 |
| $C_{20}H_{32}N_2O_{20}$ | 20 | 32 | 2 | 20 |
| $C_{20}H_{31}N_3O_{12}$ | 20 | 31 | 3 | 12 |
| $C_{20}H_{33}N_3O_{12}$ | 20 | 33 | 3 | 12 |
| $C_{20}H_{31}N_3O_{13}$ | 20 | 31 | 3 | 13 |
| $C_{20}H_{33}N_3O_{13}$ | 20 | 33 | 3 | 13 |
| $C_{20}H_{31}N_3O_{14}$ | 20 | 31 | 3 | 14 |
| $C_{20}H_{33}N_3O_{14}$ | 20 | 33 | 3 | 14 |
| $C_{20}H_{31}N_3O_{15}$ | 20 | 31 | 3 | 15 |
| $C_{20}H_{33}N_3O_{15}$ | 20 | 33 | 3 | 15 |
| $C_{20}H_{31}N_3O_{16}$ | 20 | 31 | 3 | 16 |
| $C_{20}H_{32}N_3O_{16}$ | 20 | 32 | 3 | 16 |
| $C_{20}H_{33}N_3O_{16}$ | 20 | 33 | 3 | 16 |
| $C_{20}H_{31}N_3O_{17}$ | 20 | 31 | 3 | 17 |
| $C_{20}H_{32}N_3O_{17}$ | 20 | 32 | 3 | 17 |
| $C_{20}H_{33}N_3O_{17}$ | 20 | 33 | 3 | 17 |
| $C_{20}H_{31}N_3O_{18}$ | 20 | 31 | 3 | 18 |
| $C_{20}H_{32}N_3O_{18}$ | 20 | 32 | 3 | 18 |
| $C_{20}H_{33}N_3O_{18}$ | 20 | 33 | 3 | 18 |
| $C_{20}H_{31}N_3O_{19}$ | 20 | 31 | 3 | 19 |
| $C_{20}H_{32}N_3O_{19}$ | 20 | 32 | 3 | 19 |
| $C_{20}H_{33}N_3O_{19}$ | 20 | 33 | 3 | 19 |
| $C_{20}H_{31}N_3O_{20}$ | 20 | 31 | 3 | 20 |
| $C_{20}H_{33}N_3O_{20}$ | 20 | 33 | 3 | 20 |
| $C_{20}H_{31}N_3O_{21}$ | 20 | 31 | 3 | 21 |
| $C_{20}H_{30}N_4O_{14}$ | 20 | 30 | 4 | 14 |
| $C_{20}H_{30}N_4O_{15}$ | 20 | 30 | 4 | 15 |
| $C_{20}H_{34}N_4O_{15}$ | 20 | 34 | 4 | 15 |
| $C_{20}H_{30}N_4O_{16}$ | 20 | 30 | 4 | 16 |
| $C_{20}H_{34}N_4O_{16}$ | 20 | 34 | 4 | 16 |
| $C_{20}H_{30}N_4O_{17}$ | 20 | 30 | 4 | 17 |
| $C_{20}H_{34}N_4O_{17}$ | 20 | 34 | 4 | 17 |
| $C_{20}H_{30}N_4O_{18}$ | 20 | 30 | 4 | 18 |
| $C_{20}H_{34}N_4O_{18}$ | 20 | 34 | 4 | 18 |
| $C_{20}H_{30}N_4O_{19}$ | 20 | 30 | 4 | 19 |
| $C_{20}H_{34}N_4O_{19}$ | 20 | 34 | 4 | 19 |
| $C_{20}H_{30}N_4O_{20}$ | 20 | 30 | 4 | 20 |
| $C_{20}H_{34}N_4O_{20}$ | 20 | 34 | 4 | 20 |
| $C_{20}H_{30}N_4O_{21}$ | 20 | 30 | 4 | 21 |

|                         |    |    |   |    |
|-------------------------|----|----|---|----|
| $C_{20}H_{30}N_4O_{22}$ | 20 | 30 | 4 | 22 |
| $C_{21}H_{35}N_1O_7$    | 21 | 35 | 1 | 7  |
| $C_{21}H_{35}N_1O_8$    | 21 | 35 | 1 | 8  |
| $C_{21}H_{23}N_1O_{10}$ | 21 | 23 | 1 | 10 |
| $C_{21}H_{40}N_1O_{14}$ | 21 | 40 | 1 | 14 |
| $C_{21}H_{40}N_1O_{15}$ | 21 | 40 | 1 | 15 |
| $C_{21}H_{42}N_1O_{15}$ | 21 | 42 | 1 | 15 |
| $C_{22}H_{44}N_1O_{14}$ | 22 | 44 | 1 | 14 |
| $C_{22}H_{30}N_1O_{15}$ | 22 | 30 | 1 | 15 |
| $C_{24}H_{36}N_1O_9$    | 24 | 36 | 1 | 9  |
| $C_{25}H_{32}N_2O_5$    | 25 | 32 | 2 | 5  |
| $C_{25}H_{28}N_2O_{13}$ | 25 | 28 | 2 | 13 |
| $C_{26}H_{34}N_2O_4$    | 26 | 34 | 2 | 4  |
| $C_{26}H_{34}N_2O_5$    | 26 | 34 | 2 | 5  |
| $C_{26}H_{47}N_3O_{20}$ | 26 | 47 | 3 | 20 |
| $C_{26}H_{47}N_5O_{25}$ | 26 | 47 | 5 | 25 |
| $C_{27}H_{34}N_2O_4$    | 27 | 34 | 2 | 4  |
| $C_{27}H_{36}N_2O_4$    | 27 | 36 | 2 | 4  |
| $C_{27}H_{36}N_2O_5$    | 27 | 36 | 2 | 5  |
| $C_{27}H_{24}N_2O_6$    | 27 | 24 | 2 | 6  |
| $C_{27}H_{44}N_6O_{16}$ | 27 | 44 | 6 | 16 |
| $C_{28}H_{43}N_1O_{18}$ | 28 | 43 | 1 | 18 |
| $C_{28}H_{38}N_2O_4$    | 28 | 38 | 2 | 4  |
| $C_{28}H_{38}N_2O_5$    | 28 | 38 | 2 | 5  |
| $C_{28}H_{44}N_2O_{16}$ | 28 | 44 | 2 | 16 |
| $C_{28}H_{45}N_5O_{16}$ | 28 | 45 | 5 | 16 |
| $C_{28}H_{45}N_5O_{17}$ | 28 | 45 | 5 | 17 |
| $C_{28}H_{43}N_5O_{22}$ | 28 | 43 | 5 | 22 |
| $C_{29}H_{44}N_2O_{22}$ | 29 | 44 | 2 | 22 |
| $C_{29}H_{47}N_3O_{19}$ | 29 | 47 | 3 | 19 |
| $C_{29}H_{45}N_3O_{20}$ | 29 | 45 | 3 | 20 |
| $C_{29}H_{47}N_3O_{21}$ | 29 | 47 | 3 | 21 |
| $C_{29}H_{48}N_4O_{18}$ | 29 | 48 | 4 | 18 |
| $C_{29}H_{46}N_4O_{19}$ | 29 | 46 | 4 | 19 |
| $C_{29}H_{46}N_4O_{20}$ | 29 | 46 | 4 | 20 |
| $C_{29}H_{46}N_4O_{22}$ | 29 | 46 | 4 | 22 |
| $C_{29}H_{46}N_4O_{23}$ | 29 | 46 | 4 | 23 |
| $C_{29}H_{46}N_4O_{24}$ | 29 | 46 | 4 | 24 |
| $C_{30}H_{47}N_1O_{18}$ | 30 | 47 | 1 | 18 |
| $C_{30}H_{47}N_1O_{19}$ | 30 | 47 | 1 | 19 |
| $C_{30}H_{48}N_2O_{18}$ | 30 | 48 | 2 | 18 |
| $C_{30}H_{46}N_2O_{22}$ | 30 | 46 | 2 | 22 |
| $C_{30}H_{48}N_2O_{23}$ | 30 | 48 | 2 | 23 |
| $C_{30}H_{47}N_3O_{18}$ | 30 | 47 | 3 | 18 |

|                         |    |    |   |    |
|-------------------------|----|----|---|----|
| $C_{30}H_{49}N_3O_{18}$ | 30 | 49 | 3 | 18 |
| $C_{30}H_{47}N_3O_{19}$ | 30 | 47 | 3 | 19 |
| $C_{30}H_{49}N_3O_{20}$ | 30 | 49 | 3 | 20 |
| $C_{30}H_{47}N_3O_{21}$ | 30 | 47 | 3 | 21 |
| $C_{30}H_{49}N_3O_{22}$ | 30 | 49 | 3 | 22 |
| $C_{30}H_{47}N_3O_{23}$ | 30 | 47 | 3 | 23 |
| $C_{30}H_{47}N_3O_{24}$ | 30 | 47 | 3 | 24 |
| $C_{30}H_{48}N_4O_{16}$ | 30 | 48 | 4 | 16 |
| $C_{30}H_{48}N_4O_{17}$ | 30 | 48 | 4 | 17 |
| $C_{30}H_{48}N_4O_{18}$ | 30 | 48 | 4 | 18 |
| $C_{30}H_{48}N_4O_{19}$ | 30 | 48 | 4 | 19 |
| $C_{30}H_{48}N_4O_{20}$ | 30 | 48 | 4 | 20 |
| $C_{30}H_{48}N_4O_{21}$ | 30 | 48 | 4 | 21 |
| $C_{30}H_{48}N_4O_{22}$ | 30 | 48 | 4 | 22 |
| $C_{30}H_{48}N_4O_{23}$ | 30 | 48 | 4 | 23 |
| $C_{30}H_{48}N_4O_{24}$ | 30 | 48 | 4 | 24 |
| $C_{30}H_{49}N_5O_{20}$ | 30 | 49 | 5 | 20 |

<sup>a</sup>The molecular formulas were summarized from previous studies (Shen et al., 2022; Draper et al., 2015; Pullinen et al., 2020; Guo et al., 2022a; Shen et al., 2021; Xu et al., 2021a; DeVault and Ziemann, 2021; Guo et al., 2022b).

**Table S4.** Potential reactions in the precursor-product pair analysis.

| NOCs      | Reaction type | Specific reaction <sup>a</sup>                   | Variation of atoms                    |
|-----------|---------------|--------------------------------------------------|---------------------------------------|
| CHON+     | Cond_N        | Imination reaction                               | (+NH, -O)                             |
|           |               | Intramolecular N-heterocyclic reaction           | (+N, -HO <sub>2</sub> )               |
|           | Hy_N          | Hydrolysis reaction                              | (+O, -NH); (+HO <sub>2</sub> , -N)    |
|           | De_N          | Dehydration reaction                             | -H <sub>2</sub> O                     |
|           | Cond_hy_N     | Mixed processes containing cond_N and hy_N       | -                                     |
|           | Cond_de_N     | Mixed processes containing cond_N and de_N       | -                                     |
|           | Hy_de_N       | Mixed processes containing hy_N and de_N         | -                                     |
|           | Cond_hy_de_N  | Mixed processes containing cond_N, hy_N and de_N | -                                     |
|           | Unknown_N     | Unrecognized processes                           | -                                     |
|           | CHN+          | Cond_N                                           | Intramolecular N-heterocyclic pathway |
| De_N      |               | Dehydration reaction                             | -H <sub>2</sub> O                     |
| Cond_de_N |               | Mixed processes containing cond_N and de_N       | -                                     |
| Unknown_N |               | Unrecognized processes                           | -                                     |
| CHON-     | Ox_N          | Oxidation reaction                               | (-H, +NO <sub>2</sub> )               |
|           | Hy_N          | Hydrolysis reaction                              | (+H, -NO <sub>2</sub> )               |
|           | Ox_hy_N       | Mixed processes containing ox_N and hy_N         | -                                     |
|           | Unknown_N     | Unrecognized processes                           | -                                     |

<sup>a</sup>The reactions were summarized from previous publications (Abudumutailifu et al., 2024; Liu et al., 2023b; Jiang et al., 2023; Lv et al., 2022; Su et al., 2021; Laskin et al., 2014; Kames et al., 1993; Sun et al., 2024; Lian et al., 2020).

**Table S5.** Stress values from two-dimensional NMDS ordination for different NOCs across cities.

| City | NOCs  | Stress values |
|------|-------|---------------|
| HEB  | CHON+ | 0.037         |
|      | CHN+  | 0.039         |
|      | CHON- | 0.066         |
| BJ   | CHON+ | 0.046         |
|      | CHN+  | 0.031         |
|      | CHON- | 0.028         |
| HZ   | CHON+ | 0.113         |
|      | CHN+  | 0.067         |
|      | CHON- | 0.077         |

**Table S6.** The number of compounds in each subgroup and the number and signal intensity fractions of each subgroup in ESI<sup>-</sup> mode across cities and periods.

| City            | Class                      | All period   |                  |                            | Clean period |                  |                            | Haze period  |                  |                            | Percentage                           |
|-----------------|----------------------------|--------------|------------------|----------------------------|--------------|------------------|----------------------------|--------------|------------------|----------------------------|--------------------------------------|
|                 |                            | Number       | Number frac. (%) | Signal intensity frac. (%) | Number       | Number frac. (%) | Signal intensity frac. (%) | Number       | Number frac. (%) | Signal intensity frac. (%) | Percentage increase (%) <sup>a</sup> |
| HEB             | <b>CHO+</b>                | <b>528</b>   | <b>28.2</b>      | <b>10.3</b>                | <b>524</b>   | <b>28.2</b>      | <b>13.0</b>                | <b>516</b>   | <b>28.3</b>      | <b>9.5</b>                 | <b>240.7</b>                         |
|                 | <b>CHON<sub>1-3+</sub></b> | <b>713</b>   | <b>38.1</b>      | <b>21.5</b>                | <b>702</b>   | <b>37.8</b>      | <b>23.7</b>                | <b>686</b>   | <b>37.6</b>      | <b>20.8</b>                | <b>307.4</b>                         |
|                 | CHON <sub>1+</sub>         | 414          | 22.1             | 17.1                       | 408          | 22.0             | 18.2                       | 398          | 21.8             | 16.8                       | 327.5                                |
|                 | CHON <sub>2+</sub>         | 179          | 9.6              | 1.9                        | 176          | 9.5              | 1.7                        | 171          | 9.4              | 1.9                        | 421.0                                |
|                 | CHON <sub>3+</sub>         | 120          | 6.4              | 2.6                        | 118          | 6.4              | 3.9                        | 117          | 6.4              | 2.2                        | 162.7                                |
|                 | <b>CHN<sub>1-3+</sub></b>  | <b>633</b>   | <b>33.8</b>      | <b>68.2</b>                | <b>630</b>   | <b>33.9</b>      | <b>63.3</b>                | <b>622</b>   | <b>34.1</b>      | <b>69.6</b>                | <b>410.3</b>                         |
|                 | CHN <sub>1+</sub>          | 448          | 23.9             | 61.1                       | 447          | 24.1             | 57.1                       | 439          | 24.1             | 62.3                       | 405.9                                |
|                 | CHN <sub>2+</sub>          | 173          | 9.2              | 7.0                        | 171          | 9.2              | 6.2                        | 171          | 9.4              | 7.3                        | 448.7                                |
|                 | CHN <sub>3+</sub>          | 12           | 0.6              | 0.1                        | 12           | 0.7              | 0.0                        | 12           | 0.7              | 0.1                        | 795.0                                |
|                 | <b>Re-NOCs<sup>b</sup></b> | <b>1346</b>  | <b>71.8</b>      | <b>89.7</b>                | <b>1332</b>  | <b>71.8</b>      | <b>87.0</b>                | <b>1308</b>  | <b>71.7</b>      | <b>90.5</b>                | <b>382.2</b>                         |
| <b>ALL ESI+</b> | <b>1874</b>                | <b>100.0</b> | <b>100.0</b>     | <b>1856</b>                | <b>100.0</b> | <b>100.0</b>     | <b>1824</b>                | <b>100.0</b> | <b>100.0</b>     | <b>363.9</b>               |                                      |
| BJ              | <b>CHO+</b>                | <b>533</b>   | <b>28.1</b>      | <b>23.6</b>                | <b>530</b>   | <b>28.1</b>      | <b>26.5</b>                | <b>524</b>   | <b>28.5</b>      | <b>20.4</b>                | <b>43.0</b>                          |
|                 | <b>CHON<sub>1-3+</sub></b> | <b>727</b>   | <b>38.4</b>      | <b>31.6</b>                | <b>725</b>   | <b>38.4</b>      | <b>34.8</b>                | <b>694</b>   | <b>37.7</b>      | <b>28.1</b>                | <b>49.9</b>                          |
|                 | CHON <sub>1+</sub>         | 421          | 22.2             | 25.7                       | 419          | 22.2             | 29.8                       | 403          | 21.9             | 21.3                       | 33.1                                 |
|                 | CHON <sub>2+</sub>         | 184          | 9.7              | 3.0                        | 184          | 9.8              | 2.9                        | 175          | 9.5              | 3.2                        | 106.2                                |
|                 | CHON <sub>3+</sub>         | 122          | 6.4              | 2.8                        | 122          | 6.5              | 2.1                        | 116          | 6.3              | 3.5                        | 213.2                                |
|                 | <b>CHN<sub>1-3+</sub></b>  | <b>634</b>   | <b>33.5</b>      | <b>44.9</b>                | <b>631</b>   | <b>33.5</b>      | <b>38.7</b>                | <b>621</b>   | <b>33.8</b>      | <b>51.6</b>                | <b>148.0</b>                         |
|                 | CHN <sub>1+</sub>          | 448          | 23.7             | 36.0                       | 445          | 23.6             | 30.5                       | 438          | 23.8             | 41.9                       | 155.5                                |
|                 | CHN <sub>2+</sub>          | 174          | 9.2              | 8.6                        | 174          | 9.2              | 7.7                        | 171          | 9.3              | 9.5                        | 127.6                                |
|                 | CHN <sub>3+</sub>          | 12           | 0.6              | 0.3                        | 12           | 0.6              | 0.5                        | 12           | 0.7              | 0.2                        | -9.5                                 |
|                 | <b>Re-NOCs</b>             | <b>1361</b>  | <b>71.9</b>      | <b>76.4</b>                | <b>1356</b>  | <b>71.9</b>      | <b>73.5</b>                | <b>1315</b>  | <b>71.5</b>      | <b>79.6</b>                | <b>101.6</b>                         |
| <b>ALL ESI+</b> | <b>1894</b>                | <b>100.0</b> | <b>100.0</b>     | <b>1886</b>                | <b>100.0</b> | <b>100.0</b>     | <b>1839</b>                | <b>100.0</b> | <b>100.0</b>     | <b>86.0</b>                |                                      |

|    |                            |             |              |              |             |              |              |             |              |              |              |
|----|----------------------------|-------------|--------------|--------------|-------------|--------------|--------------|-------------|--------------|--------------|--------------|
|    | <b>CHO+</b>                | <b>531</b>  | <b>28.3</b>  | <b>34.1</b>  | <b>524</b>  | <b>28.4</b>  | <b>39.6</b>  | <b>518</b>  | <b>28.2</b>  | <b>29.1</b>  | <b>-18.1</b> |
|    | <b>CHON<sub>1-3+</sub></b> | <b>715</b>  | <b>38.1</b>  | <b>35.0</b>  | <b>700</b>  | <b>37.9</b>  | <b>36.1</b>  | <b>697</b>  | <b>37.9</b>  | <b>34.0</b>  | <b>4.5</b>   |
|    | CHON <sub>1+</sub>         | 415         | 22.1         | 30.1         | 405         | 21.9         | 31.7         | 404         | 22.0         | 28.8         | 0.9          |
|    | CHON <sub>2+</sub>         | 180         | 9.6          | 3.2          | 177         | 9.6          | 3.1          | 175         | 9.5          | 3.3          | 18.2         |
|    | CHON <sub>3+</sub>         | 120         | 6.4          | 1.7          | 118         | 6.4          | 1.4          | 118         | 6.4          | 1.9          | 55.9         |
| HZ | <b>CHN<sub>1-3+</sub></b>  | <b>632</b>  | <b>33.7</b>  | <b>30.9</b>  | <b>624</b>  | <b>33.8</b>  | <b>24.3</b>  | <b>623</b>  | <b>33.9</b>  | <b>36.9</b>  | <b>69.3</b>  |
|    | CHN <sub>1+</sub>          | 445         | 23.7         | 23.7         | 437         | 23.7         | 17.8         | 438         | 23.8         | 29.0         | 81.5         |
|    | CHN <sub>2+</sub>          | 175         | 9.3          | 6.9          | 175         | 9.5          | 6.1          | 173         | 9.4          | 7.6          | 38.6         |
|    | CHN <sub>3+</sub>          | 12          | 0.6          | 0.3          | 12          | 0.7          | 0.4          | 12          | 0.7          | 0.3          | -8.6         |
|    | <b>Re-NOCs</b>             | <b>1347</b> | <b>71.7</b>  | <b>65.9</b>  | <b>1324</b> | <b>71.7</b>  | <b>60.4</b>  | <b>1320</b> | <b>71.8</b>  | <b>70.9</b>  | <b>30.5</b>  |
|    | <b>ALL ESI+</b>            | <b>1878</b> | <b>100.0</b> | <b>100.0</b> | <b>1848</b> | <b>100.0</b> | <b>100.0</b> | <b>1838</b> | <b>100.0</b> | <b>100.0</b> | <b>11.3</b>  |

<sup>a</sup>It indicates the percentage increase in signal intensities for each group from clean to haze periods.

<sup>b</sup>Re-NOCs (Reduced NOCs) denote the sum of CHN<sub>1-3+</sub> and CHON<sub>1-3+</sub> compounds.

**Table S7.** The number, number fractions, and signal intensity fractions of each subgroup in ESI- mode in different cities and periods.

| City | Class                      | All period |                  |                            | Clean period |                  |                            | Haze period |                  |                            | Percentage                           |
|------|----------------------------|------------|------------------|----------------------------|--------------|------------------|----------------------------|-------------|------------------|----------------------------|--------------------------------------|
|      |                            | Number     | Number frac. (%) | Signal intensity frac. (%) | Number       | Number frac. (%) | Signal intensity frac. (%) | Number      | Number frac. (%) | Signal intensity frac. (%) | Percentage increase (%) <sup>a</sup> |
| HEB  | <b>CHO-</b>                | <b>584</b> | <b>66.4</b>      | <b>48.2</b>                | <b>584</b>   | <b>66.4</b>      | <b>43.2</b>                | <b>568</b>  | <b>65.7</b>      | <b>51.8</b>                | <b>139.5</b>                         |
|      | <b>CHON<sub>1-3</sub>-</b> | <b>296</b> | <b>33.6</b>      | <b>51.8</b>                | <b>296</b>   | <b>33.6</b>      | <b>56.9</b>                | <b>296</b>  | <b>34.3</b>      | <b>48.2</b>                | <b>69.4</b>                          |
|      | CHON <sub>1</sub> -        | 190        | 21.6             | 48.0                       | 190          | 21.6             | 52.4                       | 190         | 22.0             | 45.0                       | 71.4                                 |
|      | CHON <sub>2</sub> -        | 72         | 8.2              | 2.1                        | 72           | 8.2              | 3.1                        | 72          | 8.3              | 1.5                        | -3.2                                 |
|      | CHON <sub>3</sub> -        | 34         | 3.9              | 1.6                        | 34           | 3.9              | 1.4                        | 34          | 3.9              | 1.8                        | 151.5                                |
|      | <b>ALL ESI-</b>            | <b>880</b> | <b>100.0</b>     | <b>100.0</b>               | <b>880</b>   | <b>100.0</b>     | <b>100.0</b>               | <b>864</b>  | <b>100.0</b>     | <b>100.0</b>               | <b>99.6</b>                          |
| BJ   | <b>CHO-</b>                | <b>589</b> | <b>66.3</b>      | <b>54.7</b>                | <b>586</b>   | <b>66.1</b>      | <b>52.7</b>                | <b>575</b>  | <b>66.0</b>      | <b>58.5</b>                | <b>15.3</b>                          |
|      | <b>CHON<sub>1-3</sub>-</b> | <b>300</b> | <b>33.8</b>      | <b>45.3</b>                | <b>300</b>   | <b>33.9</b>      | <b>47.3</b>                | <b>297</b>  | <b>34.1</b>      | <b>41.5</b>                | <b>-9.1</b>                          |
|      | CHON <sub>1</sub> -        | 193        | 21.7             | 37.9                       | 193          | 21.8             | 39.0                       | 191         | 21.9             | 35.8                       | -4.7                                 |
|      | CHON <sub>2</sub> -        | 73         | 8.2              | 5.9                        | 73           | 8.2              | 6.7                        | 72          | 8.3              | 4.4                        | -31.8                                |
|      | CHON <sub>3</sub> -        | 34         | 3.8              | 1.5                        | 34           | 3.9              | 1.6                        | 34          | 3.9              | 1.2                        | -21.9                                |
|      | <b>ALL ESI-</b>            | <b>889</b> | <b>100.0</b>     | <b>100.0</b>               | <b>886</b>   | <b>100.0</b>     | <b>100.0</b>               | <b>872</b>  | <b>100.0</b>     | <b>100.0</b>               | <b>3.8</b>                           |
| HZ   | <b>CHO-</b>                | <b>593</b> | <b>66.3</b>      | <b>67.7</b>                | <b>587</b>   | <b>66.2</b>      | <b>69.3</b>                | <b>589</b>  | <b>66.2</b>      | <b>66.1</b>                | <b>-5.8</b>                          |
|      | <b>CHON<sub>1-3</sub>-</b> | <b>301</b> | <b>33.7</b>      | <b>32.3</b>                | <b>300</b>   | <b>33.8</b>      | <b>30.7</b>                | <b>301</b>  | <b>33.8</b>      | <b>33.9</b>                | <b>8.9</b>                           |
|      | CHON <sub>1</sub> -        | 194        | 21.7             | 24.2                       | 194          | 21.9             | 22.7                       | 194         | 21.8             | 25.7                       | 11.7                                 |
|      | CHON <sub>2</sub> -        | 73         | 8.2              | 7.2                        | 72           | 8.1              | 7.0                        | 73          | 8.2              | 7.3                        | 3.3                                  |
|      | CHON <sub>3</sub> -        | 34         | 3.8              | 0.9                        | 34           | 3.8              | 1.0                        | 34          | 3.8              | 0.8                        | -14.1                                |
|      | <b>ALL ESI-</b>            | <b>894</b> | <b>100.0</b>     | <b>100.0</b>               | <b>887</b>   | <b>100.0</b>     | <b>100.0</b>               | <b>890</b>  | <b>100.0</b>     | <b>100.0</b>               | <b>-1.3</b>                          |

<sup>a</sup>It represents the percentage increase in signal intensity for each group from clean to haze periods.



**Table S8.** Signal intensity fractions of each subgroup of CHON+ and CHON− compounds in different cities and periods.

| Mode  | City | Period | Aliphatics- | Heterocyclics- | Aromatics- | Isoprene- | Monoterpenes- | Aromatics- | Aliphatics- | Unclassified |
|-------|------|--------|-------------|----------------|------------|-----------|---------------|------------|-------------|--------------|
|       |      |        | derived     | derived        | derived    | derived   | derived       | derived    | derived     | Ox_NOCs      |
|       |      |        | Re_NOCs     | Re_NOCs        | Re_NOCs    | Ox_NOCs   | Ox_NOCs       | Ox_NOCs    | Ox_NOCs     |              |
|       |      |        | (%)         | (%)            | (%)        | (%)       | (%)           | (%)        | (%)         | (%)          |
| CHON+ | HEB  | All    | 3.3         | 2.8            | 72.9       | 0.1       | 0.1           | 14.6       | 5.2         | 1.0          |
|       |      | Clean  | 7.1         | 7.6            | 59.1       | 0.1       | 0.3           | 17.7       | 7.6         | 0.6          |
|       |      | Haze   | 2.0         | 1.2            | 77.7       | 0.1       | 0.0           | 13.5       | 4.4         | 1.1          |
|       | BJ   | All    | 20.8        | 20.8           | 33.0       | 0.3       | 0.5           | 14.7       | 9.6         | 0.4          |
|       |      | Clean  | 22.4        | 24.2           | 30.8       | 0.3       | 0.6           | 11.5       | 9.8         | 0.4          |
|       |      | Haze   | 18.7        | 16.1           | 35.9       | 0.2       | 0.4           | 19.0       | 9.3         | 0.3          |
|       | HZ   | All    | 27.5        | 22.7           | 23.0       | 0.5       | 0.7           | 11.8       | 13.6        | 0.2          |
|       |      | Clean  | 27.3        | 24.4           | 24.9       | 0.5       | 0.5           | 10.1       | 12.1        | 0.2          |
|       |      | Haze   | 27.7        | 21.1           | 21.3       | 0.5       | 0.9           | 13.3       | 15.0        | 0.2          |
| CHON− | HEB  | All    | 0.4         | 0.0            | 3.6        | 1.3       | 0.3           | 90.3       | 2.3         | 1.8          |
|       |      | Clean  | 0.3         | 0.0            | 2.9        | 0.7       | 0.2           | 91.0       | 1.9         | 3.0          |
|       |      | Haze   | 0.4         | 0.0            | 4.2        | 1.8       | 0.4           | 89.7       | 2.6         | 0.9          |
|       | BJ   | All    | 0.1         | 0.0            | 4.5        | 1.3       | 0.5           | 85.7       | 4.4         | 3.5          |
|       |      | Clean  | 0.1         | 0.0            | 4.4        | 1.3       | 0.5           | 84.9       | 5.0         | 3.8          |
|       |      | Haze   | 0.1         | 0.0            | 4.8        | 1.2       | 0.6           | 87.3       | 3.2         | 2.7          |
|       | HZ   | All    | 0.3         | 0.0            | 9.9        | 1.0       | 1.7           | 71.6       | 4.4         | 11.1         |
|       |      | Clean  | 0.1         | 0.0            | 8.8        | 1.1       | 1.6           | 69.7       | 6.2         | 12.6         |
|       |      | Haze   | 0.5         | 0.0            | 11.0       | 0.8       | 1.8           | 73.4       | 2.8         | 9.7          |

**Table S9.** The number, number fractions, and signal intensity fractions of each subgroup of CHN+ compounds in different cities and periods.

| City | Class             | All period |                     |                               | Clean period |                     |                               | Haze period |                     |                               | Percentage                              |
|------|-------------------|------------|---------------------|-------------------------------|--------------|---------------------|-------------------------------|-------------|---------------------|-------------------------------|-----------------------------------------|
|      |                   | Number     | Number<br>frac. (%) | Signal intensity<br>frac. (%) | Number       | Number<br>frac. (%) | Signal intensity<br>frac. (%) | Number      | Number<br>frac. (%) | Signal intensity<br>frac. (%) | Percentage<br>increase (%) <sup>a</sup> |
| HEB  | Aliphatic CHN+    | 98         | 7.2                 | 15.5                          | 97           | 7.6                 | 15.4                          | 97          | 7.1                 | 15.6                          | 373.7                                   |
|      | Monoaromatic CHN+ | 311        | 51.9                | 49.1                          | 309          | 49.5                | 49.1                          | 305         | 52.6                | 49.0                          | 442.3                                   |
|      | Polyaromatic CHN+ | 224        | 40.9                | 35.4                          | 224          | 42.9                | 35.6                          | 220         | 40.3                | 35.4                          | 379.8                                   |
|      | All               | 633        | 100.0               | 100.0                         | 630          | 100.0               | 100.0                         | 622         | 100.0               | 100.0                         | 410.3                                   |
| BJ   | Aliphatic CHN+    | 99         | 14.3                | 15.6                          | 99           | 11.6                | 15.7                          | 98          | 16.5                | 15.8                          | 251.7                                   |
|      | Monoaromatic CHN+ | 311        | 48.4                | 49.1                          | 310          | 54.9                | 49.1                          | 304         | 43.2                | 49.0                          | 95.4                                    |
|      | Polyaromatic CHN+ | 224        | 37.3                | 35.3                          | 222          | 33.5                | 35.2                          | 219         | 40.3                | 35.3                          | 198.2                                   |
|      | All               | 634        | 100.0               | 100.0                         | 631          | 100.0               | 100.0                         | 621         | 100.0               | 100.0                         | 148.0                                   |
| HZ   | Aliphatic CHN+    | 99         | 35.5                | 15.7                          | 99           | 32.6                | 15.9                          | 98          | 37.2                | 15.7                          | 93.2                                    |
|      | Monoaromatic CHN+ | 311        | 50.9                | 49.2                          | 308          | 54.5                | 49.4                          | 307         | 48.7                | 49.3                          | 51.2                                    |
|      | Polyaromatic CHN+ | 222        | 13.7                | 35.1                          | 217          | 12.9                | 34.8                          | 218         | 14.1                | 35.0                          | 85.3                                    |
|      | All               | 632        | 100.0               | 100.0                         | 624          | 100.0               | 100.0                         | 623         | 100.0               | 100.0                         | 69.3                                    |

<sup>a</sup>It indicates the percentage increase in signal intensities of each group from clean to haze periods.

**Table S10.** The peak intensity-weighted average MF<sub>w</sub>, MM<sub>w</sub>, elemental ratios, DBE<sub>w</sub>, X<sub>Cw</sub>, AI<sub>modw</sub>, and OS<sub>Cw</sub> for different NOCs in different cities and periods.

| City | Periods      | Subgroups | MF <sub>w</sub>                                                           | MM <sub>w</sub> | O/C <sub>w</sub> | H/C <sub>w</sub> | N/C <sub>w</sub> | O/N <sub>w</sub> | DBE <sub>w</sub> | X <sub>Cw</sub> | AI <sub>modw</sub> | OS <sub>Cw</sub> |
|------|--------------|-----------|---------------------------------------------------------------------------|-----------------|------------------|------------------|------------------|------------------|------------------|-----------------|--------------------|------------------|
| HEB  | All period   | CHON+     | C <sub>11.49</sub> H <sub>14.96</sub> O <sub>1.97</sub> N <sub>1.33</sub> | 203.1           | 0.2              | 1.3              | 0.1              | 1.4              | 5.7              | 2.6             | 0.4                | -0.9             |
|      |              | CHN+      | C <sub>13.19</sub> H <sub>13.27</sub> N <sub>1.11</sub>                   | 187.1           | – <sup>a</sup>   | 1.1              | 0.1              | –                | 8.1              | 2.7             | 0.6                | -1.1             |
|      |              | CHON–     | C <sub>7.84</sub> H <sub>8.65</sub> O <sub>3.86</sub> N <sub>1.1</sub>    | 180.0           | 0.5              | 1.1              | 0.2              | 3.6              | 5.1              | 2.4             | 0.6                | 0.0              |
|      | Clean period | CHON+     | C <sub>13.51</sub> H <sub>20.47</sub> O <sub>2.18</sub> N <sub>1.4</sub>  | 237.3           | 0.2              | 1.4              | 0.1              | 1.5              | 5.0              | 2.5             | 0.3                | -1.1             |
|      |              | CHN+      | C <sub>13.4</sub> H <sub>13.01</sub> N <sub>1.1</sub>                     | 189.3           | –                | 1.0              | 0.1              | –                | 8.5              | 2.7             | 0.6                | -1.0             |
|      |              | CHON–     | C <sub>8.14</sub> H <sub>9.26</sub> O <sub>3.87</sub> N <sub>1.1</sub>    | 184.4           | 0.5              | 1.1              | 0.2              | 3.6              | 5.1              | 2.4             | 0.6                | -0.1             |
|      | Haze period  | CHON+     | C <sub>10.8</sub> H <sub>13.07</sub> O <sub>1.9</sub> N <sub>1.3</sub>    | 191.3           | 0.2              | 1.2              | 0.1              | 1.4              | 5.9              | 2.7             | 0.5                | -0.8             |
|      |              | CHN+      | C <sub>13.13</sub> H <sub>13.34</sub> N <sub>1.11</sub>                   | 186.5           | –                | 1.1              | 0.1              | –                | 8.0              | 2.7             | 0.6                | -1.1             |
|      |              | CHON–     | C <sub>7.59</sub> H <sub>8.14</sub> O <sub>3.85</sub> N <sub>1.1</sub>    | 176.3           | 0.5              | 1.1              | 0.2              | 3.7              | 5.1              | 2.4             | 0.6                | 0.0              |
| BJ   | All period   | CHON+     | C <sub>16.48</sub> H <sub>29.49</sub> O <sub>1.98</sub> N <sub>1.27</sub> | 277.0           | 0.2              | 1.7              | 0.1              | 1.5              | 3.4              | 2.0             | 0.2                | -1.4             |
|      |              | CHN+      | C <sub>13.8</sub> H <sub>15.15</sub> N <sub>1.21</sub>                    | 197.8           | –                | 1.1              | 0.1              | –                | 7.8              | 2.6             | 0.5                | -1.1             |
|      |              | CHON–     | C <sub>8.75</sub> H <sub>10.58</sub> O <sub>4.01</sub> N <sub>1.2</sub>   | 196.6           | 0.5              | 1.1              | 0.2              | 3.5              | 5.1              | 2.4             | 0.6                | -0.1             |
|      | Clean period | CHON+     | C <sub>17.21</sub> H <sub>31.44</sub> O <sub>1.76</sub> N <sub>1.2</sub>  | 283.3           | 0.1              | 1.8              | 0.1              | 1.4              | 3.1              | 1.8             | 0.1                | -1.5             |
|      |              | CHN+      | C <sub>13.84</sub> H <sub>15.7</sub> N <sub>1.22</sub>                    | 199.0           | –                | 1.1              | 0.1              | –                | 7.6              | 2.6             | 0.5                | -1.1             |
|      |              | CHON–     | C <sub>8.94</sub> H <sub>11</sub> O <sub>4.01</sub> N <sub>1.21</sub>     | 199.5           | 0.5              | 1.1              | 0.2              | 3.5              | 5.0              | 2.4             | 0.5                | -0.1             |
|      | Haze period  | CHON+     | C <sub>15.51</sub> H <sub>26.89</sub> O <sub>2.27</sub> N <sub>1.36</sub> | 268.6           | 0.2              | 1.7              | 0.1              | 1.5              | 3.8              | 2.2             | 0.2                | -1.3             |
|      |              | CHN+      | C <sub>13.77</sub> H <sub>14.7</sub> N <sub>1.19</sub>                    | 196.7           | –                | 1.1              | 0.1              | –                | 8.0              | 2.6             | 0.5                | -1.1             |
|      |              | CHON–     | C <sub>8.35</sub> H <sub>9.64</sub> O <sub>4</sub> N <sub>1.17</sub>      | 190.3           | 0.5              | 1.1              | 0.2              | 3.6              | 5.1              | 2.4             | 0.6                | 0.0              |

|    |              |       |                                                                           |       |     |     |     |     |     |     |     |      |
|----|--------------|-------|---------------------------------------------------------------------------|-------|-----|-----|-----|-----|-----|-----|-----|------|
| HZ | All period   | CHON+ | C <sub>19.04</sub> H <sub>36.31</sub> O <sub>1.81</sub> N <sub>1.19</sub> | 310.6 | 0.1 | 1.9 | 0.1 | 1.5 | 2.5 | 1.7 | 0.1 | -1.7 |
|    |              | CHN+  | C <sub>13.09</sub> H <sub>19.15</sub> N <sub>1.25</sub>                   | 193.8 | –   | 1.5 | 0.1 | –   | 5.1 | 2.1 | 0.4 | -1.5 |
|    |              | CHON– | C <sub>9.64</sub> H <sub>12.79</sub> O <sub>4.05</sub> N <sub>1.28</sub>  | 211.3 | 0.5 | 1.2 | 0.2 | 3.4 | 4.9 | 2.2 | 0.5 | -0.2 |
|    | Clean period | CHON+ | C <sub>19.14</sub> H <sub>36.49</sub> O <sub>1.71</sub> N <sub>1.16</sub> | 310.0 | 0.1 | 1.9 | 0.1 | 1.5 | 2.5 | 1.6 | 0.1 | -1.7 |
|    |              | CHN+  | C <sub>12.09</sub> H <sub>16.8</sub> N <sub>1.28</sub>                    | 180.0 | –   | 1.4 | 0.1 | –   | 5.3 | 2.2 | 0.4 | -1.4 |
|    |              | CHON– | C <sub>10.2</sub> H <sub>14.28</sub> O <sub>4.16</sub> N <sub>1.29</sub>  | 221.5 | 0.5 | 1.2 | 0.2 | 3.4 | 4.7 | 2.2 | 0.5 | -0.3 |
|    | Haze period  | CHON+ | C <sub>18.95</sub> H <sub>36.14</sub> O <sub>1.91</sub> N <sub>1.21</sub> | 311.3 | 0.1 | 1.9 | 0.1 | 1.6 | 2.5 | 1.8 | 0.1 | -1.7 |
|    |              | CHN+  | C <sub>13.68</sub> H <sub>20.54</sub> N <sub>1.22</sub>                   | 202.0 | –   | 1.5 | 0.1 | –   | 5.0 | 2.1 | 0.3 | -1.5 |
|    |              | CHON– | C <sub>9.13</sub> H <sub>11.43</sub> O <sub>3.95</sub> N <sub>1.27</sub>  | 201.9 | 0.5 | 1.1 | 0.2 | 3.4 | 5.0 | 2.2 | 0.6 | -0.1 |

<sup>a</sup>The symbol “–” indicates no data.

**Table S11.** The number, number fractions, and signal intensity fractions of CHON+ compounds formed through different processes.

| City | Class                    | All period |                  |                            | Clean period |                  |                            | Haze period |                  |                            |
|------|--------------------------|------------|------------------|----------------------------|--------------|------------------|----------------------------|-------------|------------------|----------------------------|
|      |                          | Number     | Number frac. (%) | Signal intensity frac. (%) | Number       | Number frac. (%) | Signal intensity frac. (%) | Number      | Number frac. (%) | Signal intensity frac. (%) |
| HEB  | Cond_N                   | 181        | 25.4             | 33.6                       | 179          | 25.5             | 32.5                       | 176         | 25.7             | 33.6                       |
|      | Hy_N                     | 62         | 8.7              | 3.8                        | 60           | 8.6              | 4.1                        | 62          | 9.0              | 3.6                        |
|      | De_N                     | 16         | 2.2              | 0.6                        | 16           | 2.3              | 1.6                        | 16          | 2.3              | 0.3                        |
|      | Cond_hy_N                | 206        | 28.9             | 38.1                       | 205          | 29.2             | 31.2                       | 194         | 28.3             | 40.6                       |
|      | Cond_de_N                | 46         | 6.5              | 2.2                        | 44           | 6.3              | 5.0                        | 42          | 6.1              | 1.3                        |
|      | Hy_de_N                  | 4          | 0.6              | 0.1                        | 4            | 0.6              | 0.3                        | 3           | 0.4              | 0.0                        |
|      | Cond_hy_de_N             | 54         | 7.6              | 4.4                        | 52           | 7.4              | 2.6                        | 51          | 7.4              | 4.9                        |
|      | <b><sup>a</sup>Mix_N</b> | <b>310</b> | <b>43.5</b>      | <b>44.8</b>                | <b>305</b>   | <b>43.5</b>      | <b>39.0</b>                | <b>290</b>  | <b>42.3</b>      | <b>46.8</b>                |
|      | Unknown_N                | 144        | 20.2             | 17.2                       | 142          | 20.2             | 22.8                       | 142         | 20.7             | 15.6                       |
|      | <b>All</b>               | <b>713</b> | <b>100.0</b>     | <b>100.0</b>               | <b>702</b>   | <b>100.0</b>     | <b>100.0</b>               | <b>686</b>  | <b>100.0</b>     | <b>100.0</b>               |
| BJ   | Cond_N                   | 186        | 25.6             | 34.3                       | 186          | 25.7             | 37.7                       | 179         | 25.8             | 29.7                       |
|      | Hy_N                     | 66         | 9.1              | 4.1                        | 66           | 9.1              | 4.1                        | 60          | 8.7              | 4.1                        |
|      | De_N                     | 17         | 2.3              | 0.6                        | 17           | 2.3              | 0.6                        | 16          | 2.3              | 0.7                        |
|      | Cond_hy_N                | 209        | 28.8             | 18.0                       | 208          | 28.7             | 16.6                       | 200         | 28.8             | 19.8                       |
|      | Cond_de_N                | 48         | 6.6              | 16.4                       | 48           | 6.6              | 17.8                       | 44          | 6.3              | 14.5                       |
|      | Hy_de_N                  | 4          | 0.6              | 0.4                        | 4            | 0.6              | 0.6                        | 4           | 0.6              | 0.2                        |
|      | Cond_hy_de_N             | 55         | 7.6              | 2.1                        | 55           | 7.6              | 1.5                        | 53          | 7.6              | 2.9                        |
|      | <b><sup>a</sup>Mix_N</b> | <b>316</b> | <b>43.5</b>      | <b>36.9</b>                | <b>315</b>   | <b>43.5</b>      | <b>36.5</b>                | <b>301</b>  | <b>43.4</b>      | <b>37.4</b>                |
|      | Unknown_N                | 142        | 19.5             | 24.1                       | 141          | 19.5             | 21.1                       | 138         | 19.9             | 28.1                       |
|      | <b>All</b>               | <b>727</b> | <b>100.0</b>     | <b>100.0</b>               | <b>725</b>   | <b>100.0</b>     | <b>100.0</b>               | <b>694</b>  | <b>100.0</b>     | <b>100.0</b>               |

|    |                          |            |              |              |            |              |              |            |              |              |
|----|--------------------------|------------|--------------|--------------|------------|--------------|--------------|------------|--------------|--------------|
|    | Cond_N                   | 181        | 25.3         | 31.9         | 179        | 25.6         | 33.8         | 177        | 25.4         | 29.9         |
|    | Hy_N                     | 63         | 8.8          | 5.7          | 62         | 8.9          | 5.5          | 63         | 9.0          | 5.9          |
|    | De_N                     | 16         | 2.2          | 0.7          | 14         | 2.0          | 0.4          | 16         | 2.3          | 0.7          |
|    | Cond_hy_N                | 209        | 29.2         | 17.2         | 203        | 29.0         | 18.4         | 202        | 29.0         | 16.1         |
| HZ | Cond_de_N                | 45         | 6.3          | 19.9         | 44         | 6.3          | 19.3         | 44         | 6.3          | 20.6         |
|    | Hy_de_N                  | 3          | 0.4          | 0.6          | 3          | 0.4          | 0.8          | 3          | 0.4          | 0.5          |
|    | Cond_hy_de_N             | 54         | 7.6          | 1.4          | 53         | 7.6          | 1.1          | 52         | 7.5          | 1.8          |
|    | <b><sup>a</sup>Mix_N</b> | <b>311</b> | <b>43.5</b>  | <b>39.2</b>  | <b>303</b> | <b>43.3</b>  | <b>39.5</b>  | <b>301</b> | <b>43.2</b>  | <b>38.9</b>  |
|    | Unknown_N                | 144        | 20.1         | 22.6         | 142        | 20.3         | 20.8         | 140        | 20.1         | 24.5         |
|    | <b>All</b>               | <b>715</b> | <b>100.0</b> | <b>100.0</b> | <b>700</b> | <b>100.0</b> | <b>100.0</b> | <b>697</b> | <b>100.0</b> | <b>100.0</b> |

<sup>a</sup> Mix\_N process includes cond\_hy\_N, cond\_de\_N, hy\_de\_N, and cond\_hy\_de\_N pathways.

**Table S12.** The number, number fractions and signal intensity fractions of CHN+ compounds formed through different processes.

| City | Class      | All period |                  |                            | Clean period |                  |                            | Haze period |                  |                            |
|------|------------|------------|------------------|----------------------------|--------------|------------------|----------------------------|-------------|------------------|----------------------------|
|      |            | Number     | Number frac. (%) | Signal intensity frac. (%) | Number       | Number frac. (%) | Signal intensity frac. (%) | Number      | Number frac. (%) | Signal intensity frac. (%) |
| HEB  | Cond_N     | 134        | 27.4             | 21.2                       | 129          | 22.7             | 20.5                       | 134         | 28.6             | 21.5                       |
|      | De_N       | 39         | 1.8              | 6.2                        | 38           | 1.1              | 6.0                        | 39          | 2.0              | 6.3                        |
|      | Cond_de_N  | 172        | 33.8             | 27.2                       | 172          | 37.7             | 27.3                       | 165         | 32.8             | 26.5                       |
|      | Unknown_N  | 288        | 37.0             | 45.5                       | 291          | 38.5             | 46.2                       | 284         | 36.7             | 45.7                       |
|      | <b>All</b> | <b>633</b> | <b>100.0</b>     | <b>100.0</b>               | <b>630</b>   | <b>100.0</b>     | <b>100.0</b>               | <b>622</b>  | <b>100.0</b>     | <b>100.0</b>               |
| BJ   | Cond_N     | 133        | 20.4             | 21.0                       | 133          | 20.4             | 21.1                       | 127         | 20.3             | 20.5                       |
|      | De_N       | 39         | 5.7              | 6.2                        | 39           | 5.4              | 6.2                        | 38          | 6.0              | 6.1                        |
|      | Cond_de_N  | 172        | 34.8             | 27.1                       | 172          | 38.5             | 27.3                       | 169         | 31.8             | 27.2                       |
|      | Unknown_N  | 290        | 39.1             | 45.7                       | 287          | 35.7             | 45.5                       | 287         | 41.9             | 46.2                       |
|      | <b>All</b> | <b>634</b> | <b>100.0</b>     | <b>100.0</b>               | <b>631</b>   | <b>100.0</b>     | <b>100.0</b>               | <b>621</b>  | <b>100.0</b>     | <b>100.0</b>               |
| HZ   | Cond_N     | 134        | 12.6             | 21.2                       | 132          | 13.1             | 21.2                       | 134         | 12.8             | 21.5                       |
|      | De_N       | 39         | 10.3             | 6.2                        | 38           | 9.5              | 6.1                        | 38          | 10.7             | 6.1                        |
|      | Cond_de_N  | 174        | 38.0             | 27.5                       | 174          | 47.7             | 27.9                       | 161         | 31.7             | 25.8                       |
|      | Unknown_N  | 285        | 39.1             | 45.1                       | 280          | 29.7             | 44.9                       | 290         | 44.8             | 46.6                       |
|      | <b>All</b> | <b>632</b> | <b>100.0</b>     | <b>100.0</b>               | <b>624</b>   | <b>100.0</b>     | <b>100.0</b>               | <b>623</b>  | <b>100.0</b>     | <b>100.0</b>               |

**Table S13.** The number, number fractions and signal intensity fractions of CHON– compounds formed through different processes.

| City | Class      | All period |                  |                            | Clean period |                  |                            | Haze period |                  |                            |
|------|------------|------------|------------------|----------------------------|--------------|------------------|----------------------------|-------------|------------------|----------------------------|
|      |            | Number     | Number frac. (%) | Signal intensity frac. (%) | Number       | Number frac. (%) | Signal intensity frac. (%) | Number      | Number frac. (%) | Signal intensity frac. (%) |
| HEB  | Ox_N       | 104        | 10.8             | 35.1                       | 104          | 12.3             | 35.1                       | 104         | 9.6              | 35.1                       |
|      | Hy_N       | 12         | 1.7              | 4.1                        | 12           | 1.2              | 4.1                        | 12          | 2.2              | 4.1                        |
|      | Ox_hy_N    | 35         | 66.4             | 11.8                       | 35           | 63.7             | 11.8                       | 35          | 68.6             | 11.8                       |
|      | Unknown_N  | 145        | 21.1             | 49.0                       | 145          | 22.9             | 49.0                       | 145         | 19.6             | 49.0                       |
|      | <b>All</b> | <b>296</b> | <b>100.0</b>     | <b>100.0</b>               | <b>296</b>   | <b>100.0</b>     | <b>100.0</b>               | <b>296</b>  | <b>100.0</b>     | <b>100.0</b>               |
| BJ   | Ox_N       | 107        | 15.2             | 35.7                       | 107          | 15.9             | 35.7                       | 105         | 13.6             | 35.4                       |
|      | Hy_N       | 12         | 1.3              | 4.0                        | 12           | 1.5              | 4.0                        | 11          | 0.8              | 3.7                        |
|      | Ox_hy_N    | 35         | 57.0             | 11.7                       | 35           | 53.9             | 11.7                       | 35          | 63.7             | 11.8                       |
|      | Unknown_N  | 146        | 26.6             | 48.7                       | 146          | 28.7             | 48.7                       | 146         | 21.9             | 49.2                       |
|      | <b>All</b> | <b>300</b> | <b>100.0</b>     | <b>100.0</b>               | <b>300</b>   | <b>100.0</b>     | <b>100.0</b>               | <b>297</b>  | <b>100.0</b>     | <b>100.0</b>               |
| HZ   | Ox_N       | 107        | 18.1             | 35.6                       | 107          | 15.8             | 35.7                       | 102         | 20.1             | 33.9                       |
|      | Hy_N       | 12         | 0.6              | 4.0                        | 12           | 0.6              | 4.0                        | 12          | 0.7              | 4.0                        |
|      | Ox_hy_N    | 35         | 46.1             | 11.6                       | 35           | 45.0             | 11.7                       | 35          | 47.0             | 11.6                       |
|      | Unknown_N  | 147        | 35.2             | 48.8                       | 146          | 38.6             | 48.7                       | 152         | 32.2             | 50.5                       |
|      | <b>All</b> | <b>301</b> | <b>100.0</b>     | <b>100.0</b>               | <b>300</b>   | <b>100.0</b>     | <b>100.0</b>               | <b>301</b>  | <b>100.0</b>     | <b>100.0</b>               |



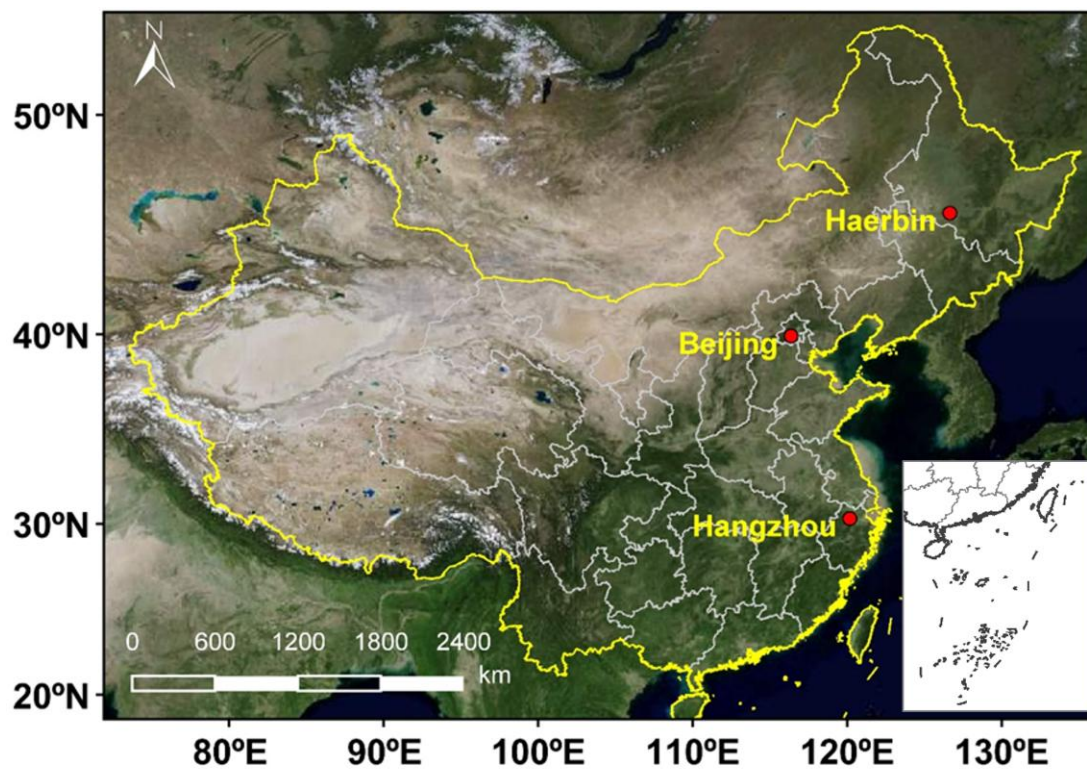

**Figure S1.** The location of the PM<sub>2.5</sub> sampling sites in HEB, BJ, and HZ, respectively. The map is derived from ©MeteoInfoMap (version 3.6.2) (Chinese Academy of Meteorological Sciences, China). The figure may contain a territory that is disputed according to the United Nations.

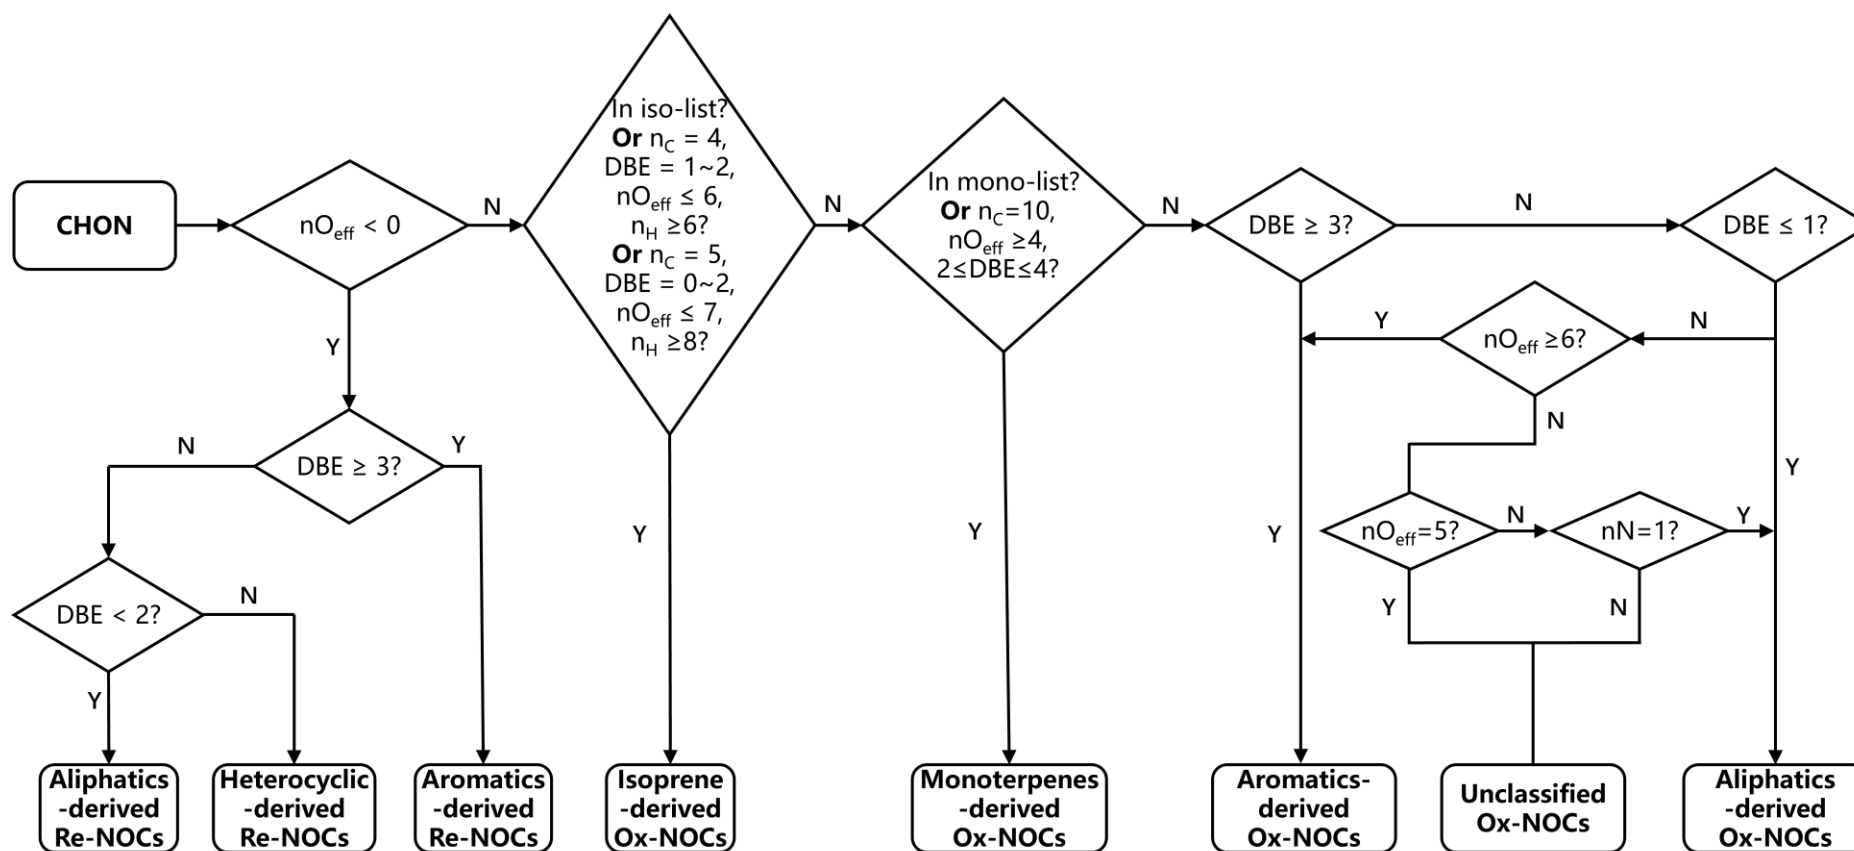

**Figure S2.** Workflow for identifying the potential precursors of CHON compounds. The symbol  $nO_{eff}$ ,  $n_C$ ,  $n_H$ , and  $n_N$  represent the number of effective oxygen, carbon, hydrogen, and nitrogen atoms in each CHON molecular formula, respectively. The symbols 'Y' and 'N' represent 'yes' and 'no,' respectively.

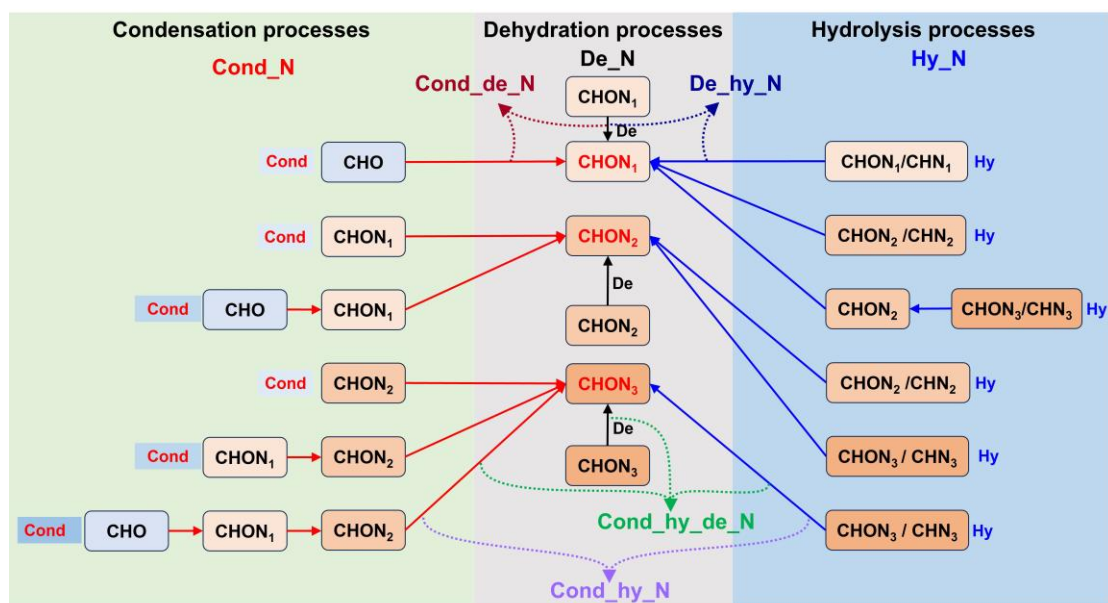

**Figure S3.** Schematic diagram for identifying the different formation processes of CHON<sub>N</sub> compounds.

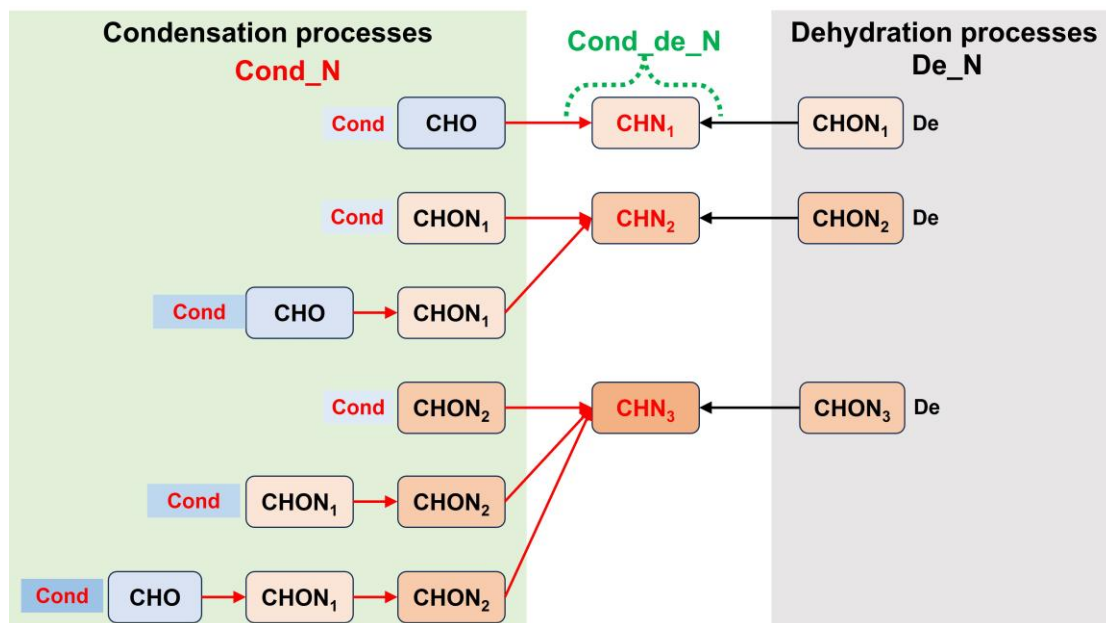

**Figure S4.** Schematic diagram for identifying the different formation processes of CHN<sup>+</sup> compounds.

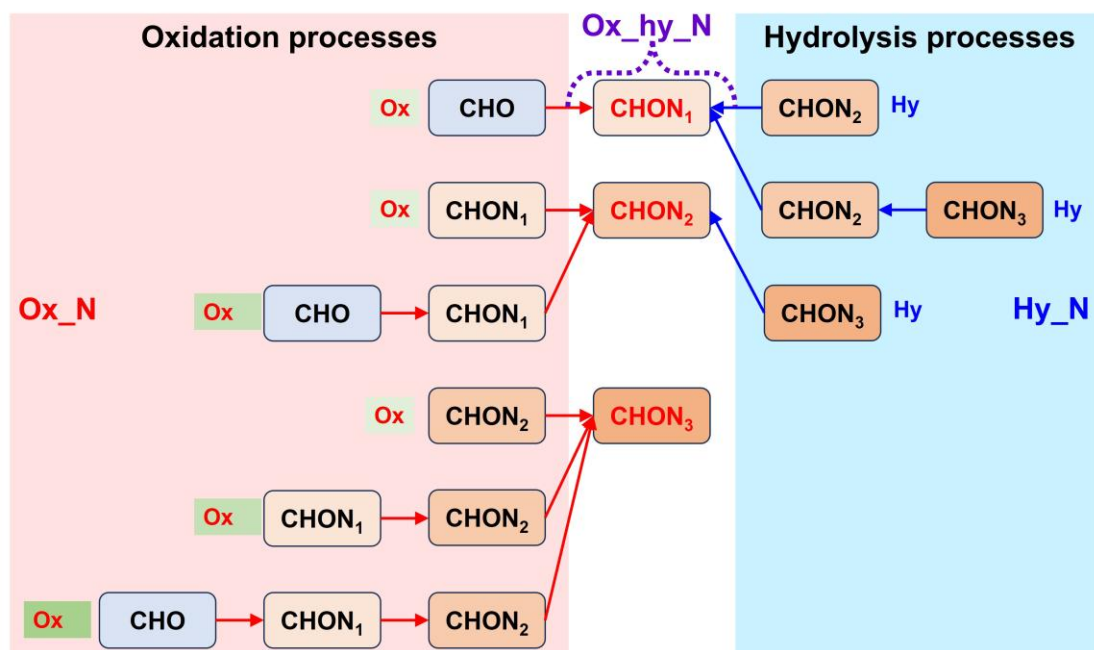

**Figure S5.** Schematic diagram for identifying the different formation processes of CHON– compounds.

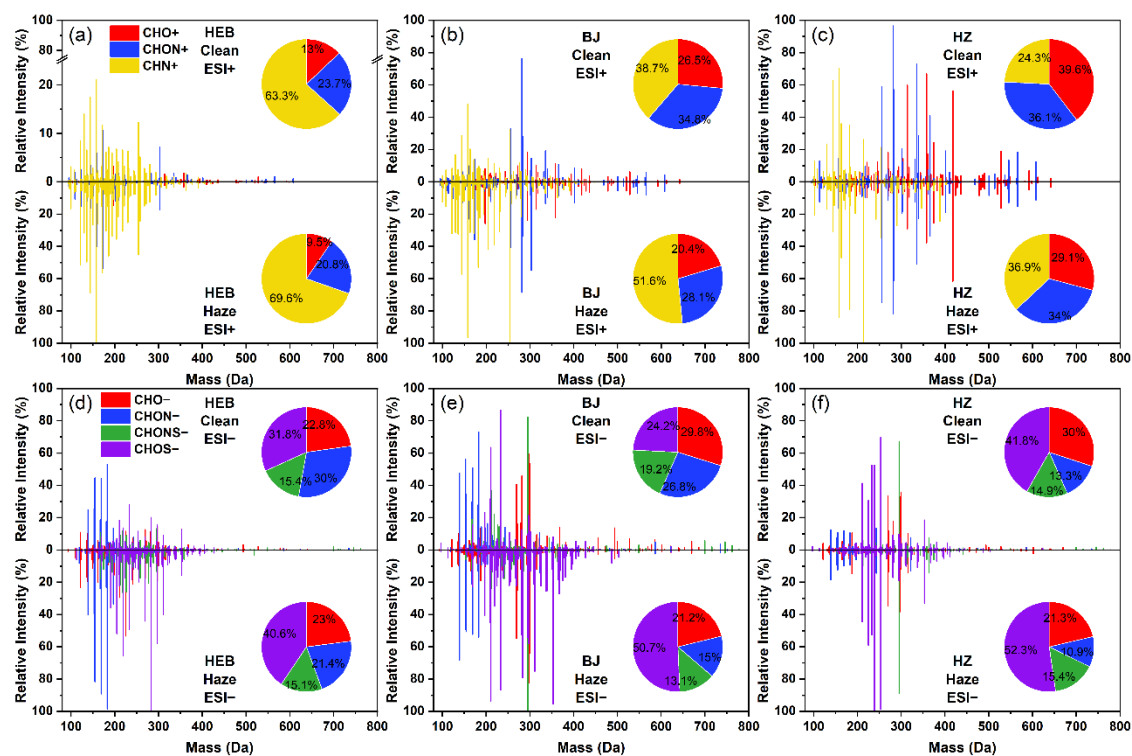

**Figure S6.** Reconstructed mass spectrum distributions of detected species in PM<sub>2.5</sub> for (a–c) ESI+ and (d–f) ESI– modes in different cities. The vertical axis represents the relative signal intensity of each compound compared to that of the compound with the highest peak intensity. The pie charts show the signal intensity fractions of classified compounds among all species detected in PM<sub>2.5</sub> during different periods.

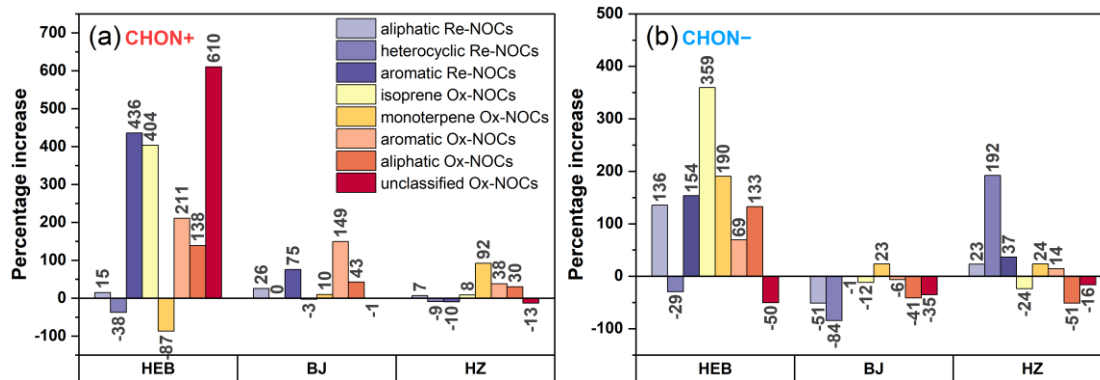

**Figure S7.** Percentage variations in the signal intensities of each subgroup of **(a)** CHON+ and **(b)** CHON- compounds from haze to clean periods in different cities.

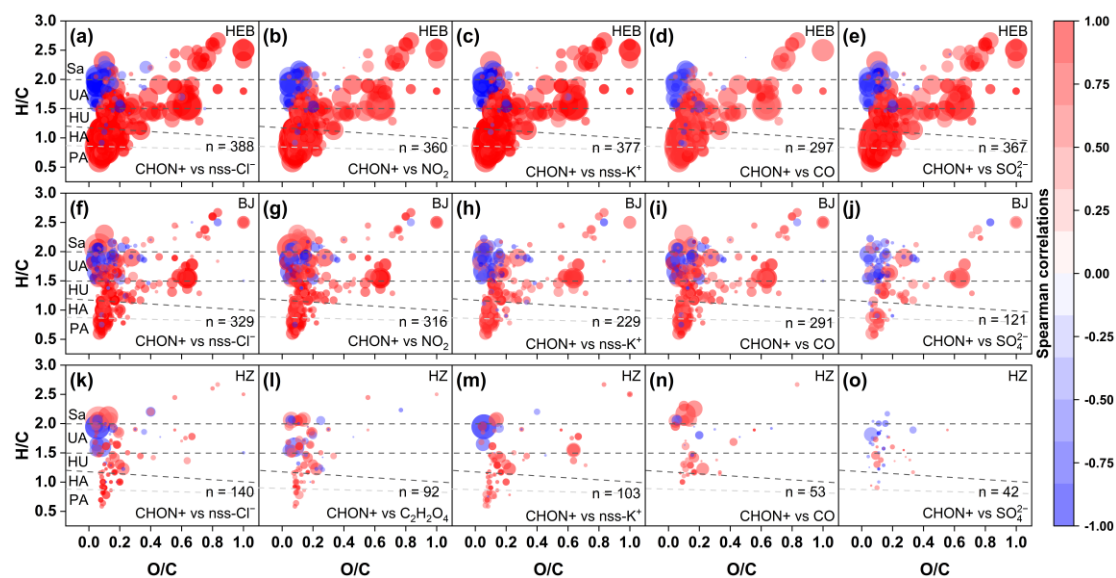

**Figure S8.** Spearman rank correlation coefficients (with  $P < 0.01$  in HEB and  $P < 0.05$  in BJ and HZ) of individual CHON+ molecules with selected parameters in (a–e) HEB, (f–j) BJ, and (k–o) HZ. The color scale indicates the Spearman correlations between the intensities of individual CHON+ molecules and each parameter. The symbol  $n$  in the bottom-right corner of each panel indicates the number of molecular formulas significantly correlated with the variables (e.g., nss-Cl<sup>-</sup>, nss-K<sup>+</sup>, and CO). The subgroups of compounds in the panels include polycyclic aromatic-like (PA), highly aromatic-like (HA), highly unsaturated-like (HU), unsaturated aliphatic-like (UA), and saturated-like (Sa) compounds.



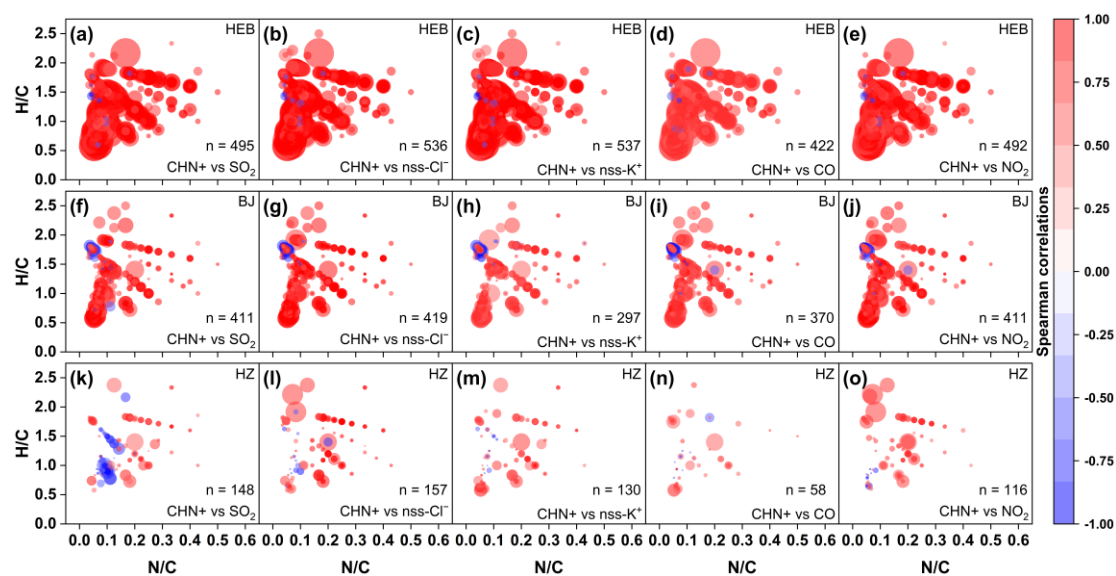

**Figure S9.** Spearman rank correlation coefficients (with  $P < 0.01$  in HEB and  $P < 0.05$  in BJ and HZ) of individual CHN+ molecules with selected parameters in (a–e) HEB, (f–j) BJ, and (k–o) HZ. The color scale indicates the Spearman correlations between the intensities of individual CHN+ molecules and each parameter. The symbol  $n$  in the bottom-right corner of each panel represents the number of molecular formulas significantly correlated with the variables (e.g.,  $\text{SO}_2$ ,  $\text{nss-Cl}^-$ ,  $\text{nss-K}^-$ ,  $\text{CO}$ , and  $\text{NO}_2$ ).

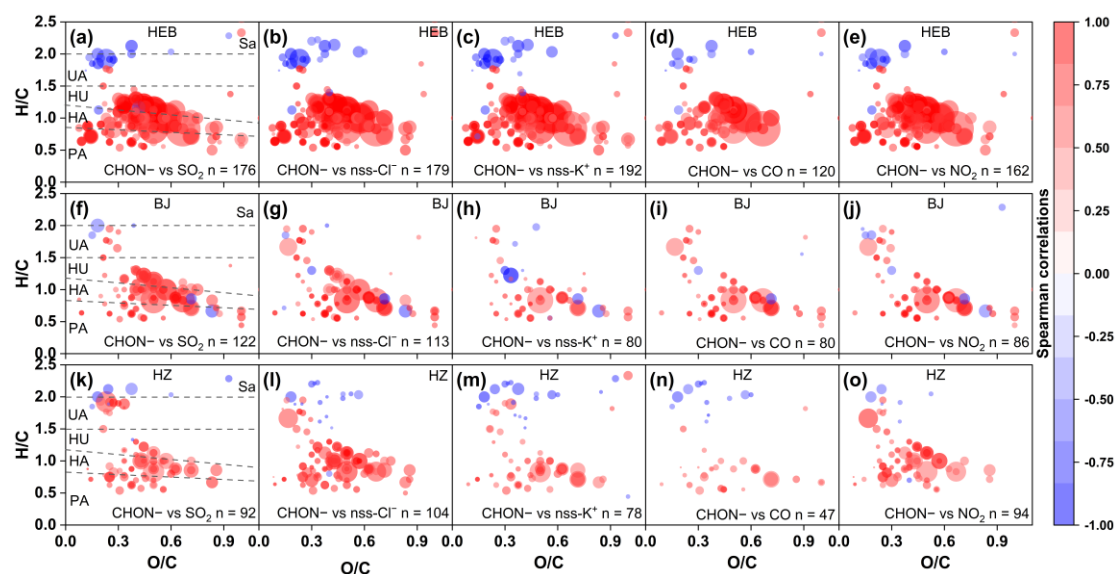

**Figure S10.** Spearman rank correlation coefficients (with  $P < 0.01$  in HEB and  $P < 0.05$  in BJ and HZ) of individual CHON<sup>-</sup> molecules with selected parameters in (a–e) HEB, (f–j) BJ, and (k–o) HZ. The color scale indicates the Spearman correlations between the intensities of individual CHON<sup>-</sup> molecules and each parameter. The symbol  $n$  in the bottom-right corner of each panel represents the number of molecular formulas significantly correlated with the variables (e.g., SO<sub>2</sub>, nss-Cl<sup>-</sup>, nss-K<sup>+</sup>, CO, and NO<sub>2</sub>). The subgroups of compounds in the panels include polycyclic aromatic-like (PA), highly aromatic-like (HA), highly unsaturated-like (HU), unsaturated aliphatic-like (UA), and saturated-like (Sa) compounds.

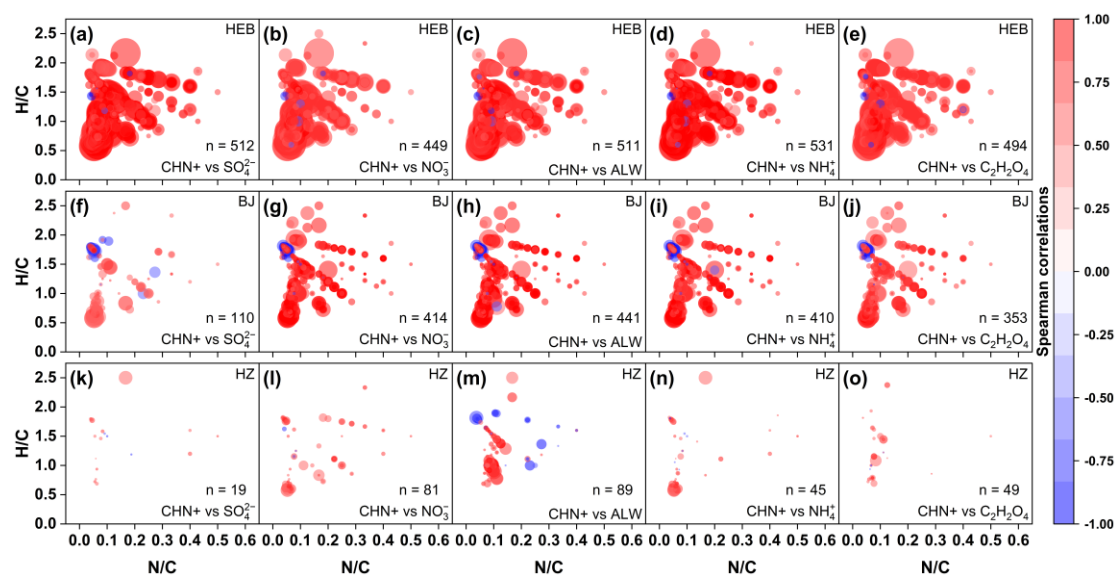

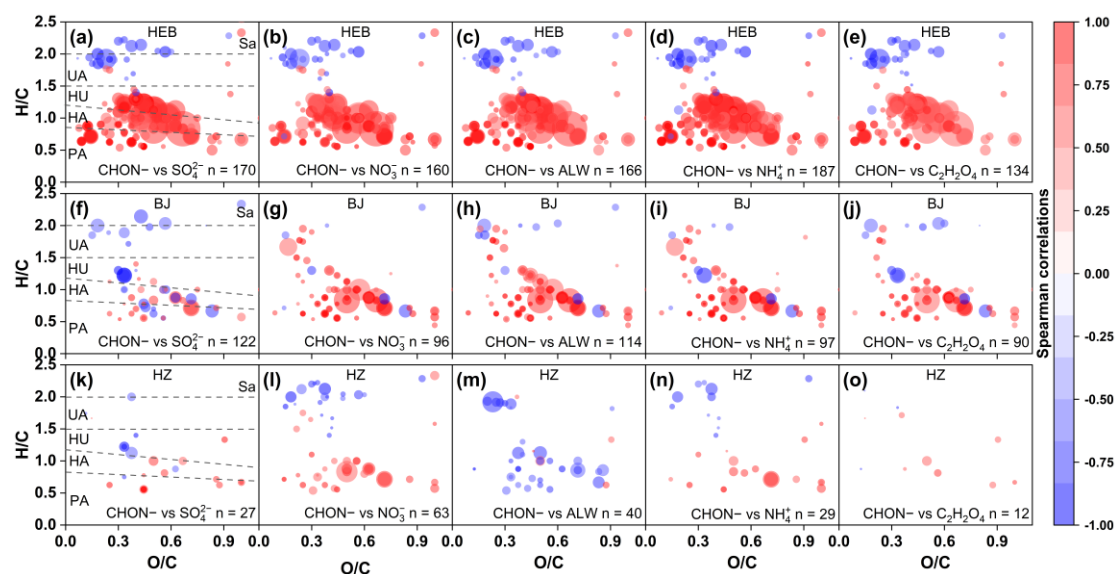

**Figure S12.** Spearman rank correlation coefficients (with  $P < 0.01$  in HEB and  $P < 0.05$  in BJ and HZ) of individual CHON<sup>-</sup> molecules with selected parameters in (a–e) HEB, (f–j) BJ, and (k–o) HZ. The color scale indicates the Spearman correlations between the intensities of individual CHON<sup>-</sup> molecules and each parameter. The symbol  $n$  in the bottom-right corner of each panel represents the number of molecular formulas significantly correlated with the variables (e.g.,  $\text{SO}_4^{2+}$ ,  $\text{NO}_3^-$ , ALW,  $\text{NH}_4^+$ , and  $\text{C}_2\text{H}_4\text{O}_4$ ). The subgroups of compounds in the panels include polycyclic aromatic-like (PA), highly aromatic-like (HA), highly unsaturated-like (HU), unsaturated aliphatic-like (UA), and saturated-like (Sa) compounds.

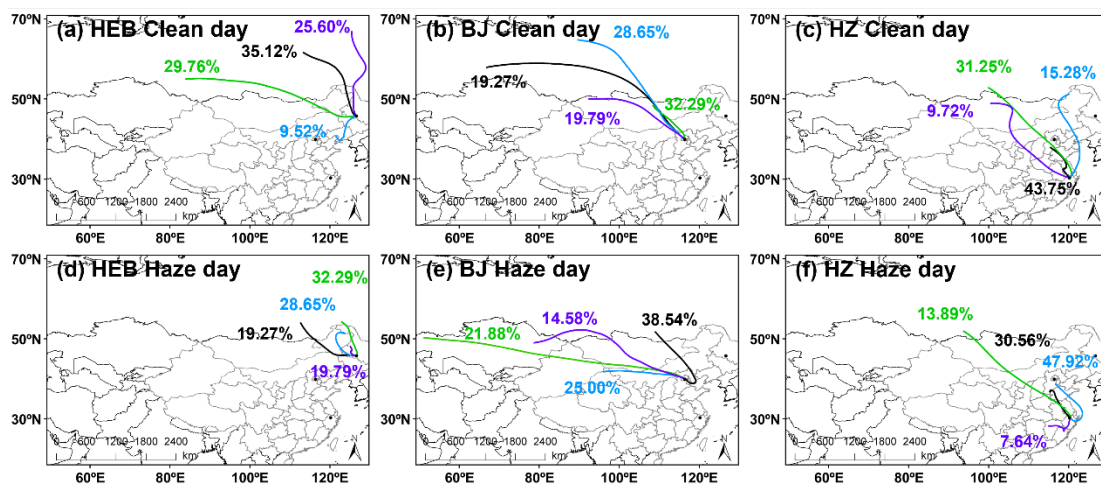

**Figure S13.** Three-day (72 h) back trajectories illustrating the major air mass transported to the study sites during the (a–c) clean and (d–f) haze periods. The map is derived from ©MeteoInfoMap (version 3.6.2) (Chinese Academy of Meteorological Sciences, China).

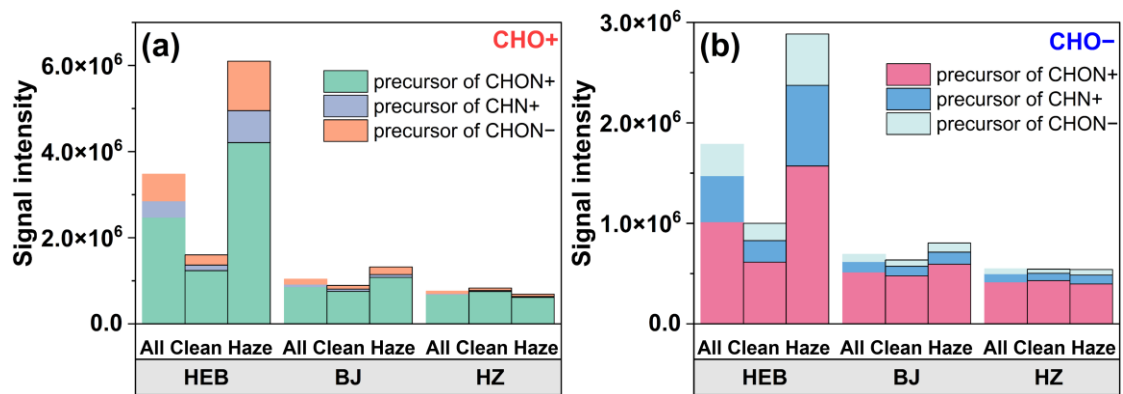

**Figure S14.** Average signal intensity distributions of (a) CHO<sup>+</sup> and (b) CHO<sup>-</sup> precursors of NOCs in PM<sub>2.5</sub> samples collected from different cities during winter.

## REFERENCES

- Abudumutailifu, M., Shang, X., Wang, L., Zhang, M., Kang, H., Chen, Y., Li, L., Ju, R., Li, B., Ouyang, H., Tang, X., Li, C., Wang, L., Wang, X., George, C., Rudich, Y., Zhang, R., and Chen, J.: Unveiling the Molecular Characteristics, Origins, and Formation Mechanism of Reduced Nitrogen Organic Compounds in the Urban Atmosphere of Shanghai Using a Versatile Aerosol Concentration Enrichment System, *Environ. Sci. Technol.*, 10.1021/acs.est.3c04071, 2024.
- Bae, E., Yeo, I. J., Jeong, B., Shin, Y., Shin, K.-H., and Kim, S.: Study of Double Bond Equivalent and the Numbers of Carbon and Oxygen Atom Distribution of Dissolved Organic Matter with Negative-Mode FT-ICR MS, *Anal. Chem.*, 83, 4193-4199, 10.1021/ac200464q, 2011.
- Boyd, C. M., Sanchez, J., Xu, L., Eugene, A. J., Nah, T., Tuet, W. Y., Guzman, M. I., and Ng, N. L.: Secondary organic aerosol formation from the  $\beta$ -pinene+NO<sub>3</sub> system: effect of humidity and peroxy radical fate, *Atmos. Chem. Phys.*, 15, 7497-7522, 10.5194/acp-15-7497-2015, 2015.
- Darer, A. I., Cole-Filipiak, N. C., O'Connor, A. E., and Elrod, M. J.: Formation and Stability of Atmospherically Relevant Isoprene-Derived Organosulfates and Organonitrates, *Environ. Sci. Technol.*, 45, 1895-1902, 10.1021/es103797z, 2011.
- DeVault, M. P. and Ziemann, P. J.: Gas- and Particle-Phase Products and Their Mechanisms of Formation from the Reaction of  $\Delta$ -3-Carene with NO<sub>3</sub> Radicals, *The Journal of Physical Chemistry A*, 125, 10207-10222, 10.1021/acs.jpca.1c07763, 2021.

- Draper, D. C., Farmer, D. K., Desyaterik, Y., and Fry, J. L.: A qualitative comparison of secondary organic aerosol yields and composition from ozonolysis of monoterpenes at varying concentrations of NO<sub>2</sub>, *Atmos. Chem. Phys.*, **15**, 12267-12281, 10.5194/acp-15-12267-2015, 2015.
- Guo, Y., Shen, H., Pullinen, I., Luo, H., Kang, S., Vereecken, L., Fuchs, H., Hallquist, M., Acir, I. H., Tillmann, R., Rohrer, F., Wildt, J., Kiendler-Scharr, A., Wahner, A., Zhao, D., and Mentel, T. F.: Identification of highly oxygenated organic molecules and their role in aerosol formation in the reaction of limonene with nitrate radical, *Atmos. Chem. Phys.*, **22**, 11323-11346, 10.5194/acp-22-11323-2022, 2022a.
- Guo, Y., Yan, C., Liu, Y., Qiao, X., Zheng, F., Zhang, Y., Zhou, Y., Li, C., Fan, X., Lin, Z., Feng, Z., Zhang, Y., Zheng, P., Tian, L., Nie, W., Wang, Z., Huang, D., Daellenbach, K. R., Yao, L., Dada, L., Bianchi, F., Jiang, J., Liu, Y., Kerminen, V. M., and Kulmala, M.: Seasonal variation in oxygenated organic molecules in urban Beijing and their contribution to secondary organic aerosol, *Atmos. Chem. Phys.*, **22**, 10077-10097, 10.5194/acp-22-10077-2022, 2022b.
- Jiang, H., Cai, J., Feng, X., Chen, Y., Wang, L., Jiang, B., Liao, Y., Li, J., Zhang, G., Mu, Y., and Chen, J.: Aqueous-Phase Reactions of Anthropogenic Emissions Lead to the High Chemodiversity of Atmospheric Nitrogen-Containing Compounds during the Haze Event, *Environ. Sci. Technol.*, **57**, 16500-16511, 10.1021/acs.est.3c06648, 2023.
- Kames, J., Schurath, U., Flocke, F., and Volz-Thomas, A.: Preparation of organic nitrates from alcohols and N<sub>2</sub>O<sub>5</sub> for species identification in atmospheric samples,



- Journal of Atmospheric Chemistry, 16, 349-359, 10.1007/BF01032630, 1993.
- Kroll, J. H., Donahue, N. M., Jimenez, J. L., Kessler, S. H., Canagaratna, M. R., Wilson, K. R., Altieri, K. E., Mazzoleni, L. R., Wozniak, A. S., Bluhm, H., Mysak, E. R., Smith, J. D., Kolb, C. E., and Worsnop, D. R.: Carbon oxidation state as a metric for describing the chemistry of atmospheric organic aerosol, *Nat. Chem.*, 3, 133-139, <https://doi.org/10.1038/nchem.948>, 2011.
- Kruve, A., Kaupmees, K., Liigand, J., and Leito, I.: Negative Electrospray Ionization via Deprotonation: Predicting the Ionization Efficiency, *Anal. Chem.*, 86, 4822-4830, 10.1021/ac404066v, 2014.
- Kuehnbaum, N. L. and Britz-McKibbin, P.: New Advances in Separation Science for Metabolomics: Resolving Chemical Diversity in a Post-Genomic Era, *Chem. Rev.*, 113, 2437-2468, 10.1021/cr300484s, 2013.
- Laskin, J., Laskin, A., Roach, P. J., Slysz, G. W., Anderson, G. A., Nizkorodov, S. A., Bones, D. L., and Nguyen, L. Q.: High-Resolution Desorption Electrospray Ionization Mass Spectrometry for Chemical Characterization of Organic Aerosols, *Anal. Chem.*, 82, 2048-2058, 10.1021/ac902801f, 2010.
- Laskin, J., Laskin, A., Nizkorodov, S. A., Roach, P., Eckert, P., Gilles, M. K., Wang, B., Lee, H. J., and Hu, Q.: Molecular Selectivity of Brown Carbon Chromophores, *Environ. Sci. Technol.*, 48, 12047-12055, <https://doi.org/10.1021/es503432r>, 2014.
- Lechtenfeld, O. J., Kattner, G., Flerus, R., McCallister, S. L., Schmitt-Kopplin, P., and Koch, B. P.: Molecular transformation and degradation of refractory dissolved organic matter in the Atlantic and Southern Ocean, *Geochim. Cosmochim. Acta*,

126, 321-337, <https://doi.org/10.1016/j.gca.2013.11.009>, 2014.

Leito, I., Herodes, K., Huopola, M., Virro, K., Künnapas, A., Krüve, A., and Tanner, R.: Towards the electrospray ionization mass spectrometry ionization efficiency scale of organic compounds, *Rapid Commun. Mass Spectrom.*, 22, 379-384, <https://doi.org/10.1002/rcm.3371>, 2008.

Lian, L., Yan, S., Zhou, H., and Song, W.: Overview of the Phototransformation of Wastewater Effluents by High-Resolution Mass Spectrometry, *Environ. Sci. Technol.*, 54, 1816-1826, [10.1021/acs.est.9b04669](https://doi.org/10.1021/acs.est.9b04669), 2020.

Liu, X., Wang, H., Wang, F., Lv, S., Wu, C., Zhao, Y., Zhang, S., Liu, S., Xu, X., Lei, Y., and Wang, G.: Secondary Formation of Atmospheric Brown Carbon in China Haze: Implication for an Enhancing Role of Ammonia, *Environ. Sci. Technol.*, 57, 11163-11172, [10.1021/acs.est.3c03948](https://doi.org/10.1021/acs.est.3c03948), 2023a.

Liu, Z., Zhu, B., Zhu, C., Ruan, T., Li, J., Chen, H., Li, Q., Wang, X., Wang, L., Mu, Y., Collett, J., George, C., Wang, Y., Wang, X., Su, J., Yu, S., Mellouki, A., Chen, J., and Jiang, G.: Abundant nitrogenous secondary organic aerosol formation accelerated by cloud processing, *iScience*, 26, 108317, <https://doi.org/10.1016/j.isci.2023.108317>, 2023b.

Lv, S., Wang, F., Wu, C., Chen, Y., Liu, S., Zhang, S., Li, D., Du, W., Zhang, F., Wang, H., Huang, C., Fu, Q., Duan, Y., and Wang, G.: Gas-to-Aerosol Phase Partitioning of Atmospheric Water-Soluble Organic Compounds at a Rural Site in China: An Enhancing Effect of NH<sub>3</sub> on SOA Formation, *Environ. Sci. Technol.*, 56, 3915-3924, [10.1021/acs.est.1c06855](https://doi.org/10.1021/acs.est.1c06855), 2022.

- Ma, Y. J., Xu, Y., Yang, T., Xiao, H. W., and Xiao, H. Y.: Measurement report: Characteristics of nitrogen-containing organics in PM<sub>2.5</sub> in Ürümqi, northwestern China – differential impacts of combustion of fresh and aged biomass materials, *Atmos. Chem. Phys.*, 24, 4331-4346, 10.5194/acp-24-4331-2024, 2024.
- Ng, N. L., Kwan, A. J., Surratt, J. D., Chan, A. W. H., Chhabra, P. S., Sorooshian, A., Pye, H. O. T., Crounse, J. D., Wennberg, P. O., Flagan, R. C., and Seinfeld, J. H.: Secondary organic aerosol (SOA) formation from reaction of isoprene with nitrate radicals (NO<sub>3</sub>), *Atmos. Chem. Phys.*, 8, 4117-4140, 10.5194/acp-8-4117-2008, 2008.
- Ni, T., Li, P., Han, B., Bai, Z., Ding, X., Wang, Q., Huo, J., and Lu, B.: Spatial and Temporal Variation of Chemical Composition and Mass Closure of Ambient PM<sub>10</sub> in Tianjin, China, *Aerosol and Air Quality Research*, 13, 1832-1846, 10.4209/aaqr.2012.10.0283, 2013.
- Nie, W., Yan, C., Huang, D. D., Wang, Z., Liu, Y., Qiao, X., Guo, Y., Tian, L., Zheng, P., Xu, Z., Li, Y., Xu, Z., Qi, X., Sun, P., Wang, J., Zheng, F., Li, X., Yin, R., Dallenbach, K. R., Bianchi, F., Petäjä, T., Zhang, Y., Wang, M., Schervish, M., Wang, S., Qiao, L., Wang, Q., Zhou, M., Wang, H., Yu, C., Yao, D., Guo, H., Ye, P., Lee, S., Li, Y. J., Liu, Y., Chi, X., Kerminen, V.-M., Ehn, M., Donahue, N. M., Wang, T., Huang, C., Kulmala, M., Worsnop, D., Jiang, J., and Ding, A.: Secondary organic aerosol formed by condensing anthropogenic vapours over China's megacities, *Nature Geoscience*, 15, 255-261, 10.1038/s41561-022-00922-5, 2022.
- Núñez, O. and Paolo, L.: Applications and uses of formic acid in liquid

- chromatography-mass spectrometry analysis, in: *Advances in Chemistry Research*, edited by: Taylor, J. C., Nova Science Publishers, 71-86, 2014.
- Praplan, A. P., Hegyi-Gaeggeler, K., Barmet, P., Pfaffenberger, L., Dommen, J., and Baltensperger, U.: Online measurements of water-soluble organic acids in the gas and aerosol phase from the photooxidation of 1,3,5-trimethylbenzene, *Atmos. Chem. Phys.*, 14, 8665-8677, 10.5194/acp-14-8665-2014, 2014.
- Pullinen, I., Schmitt, S., Kang, S., Sarrafzadeh, M., Schlag, P., Andres, S., Kleist, E., Mentel, T. F., Rohrer, F., Springer, M., Tillmann, R., Wildt, J., Wu, C., Zhao, D., Wahner, A., and Kiendler-Scharr, A.: Impact of NO<sub>x</sub> on secondary organic aerosol (SOA) formation from  $\alpha$ -pinene and  $\beta$ -pinene photooxidation: the role of highly oxygenated organic nitrates, *Atmos. Chem. Phys.*, 20, 10125-10147, 10.5194/acp-20-10125-2020, 2020.
- Schmidt, A.-C., Herzsuh, R., Matysik, F.-M., and Engewald, W.: Investigation of the ionisation and fragmentation behaviour of different nitroaromatic compounds occurring as polar metabolites of explosives using electrospray ionisation tandem mass spectrometry, *Rapid Commun. Mass Spectrom.*, 20, 2293-2302, <https://doi.org/10.1002/rcm.2591>, 2006.
- Seidel, M., Beck, M., Riedel, T., Waska, H., Suryaputra, I. G. N. A., Schnetger, B., Niggemann, J., Simon, M., and Dittmar, T.: Biogeochemistry of dissolved organic matter in an anoxic intertidal creek bank, *Geochim. Cosmochim. Acta*, 140, 418-434, <https://doi.org/10.1016/j.gca.2014.05.038>, 2014.
- Shen, H., Vereecken, L., Kang, S., Pullinen, I., Fuchs, H., Zhao, D., and Mentel, T. F.:

- Unexpected significance of a minor reaction pathway in daytime formation of biogenic highly oxygenated organic compounds, *Science Advances*, 8, eabp8702, doi:10.1126/sciadv.abp8702, 2022.
- Shen, H., Zhao, D., Pullinen, I., Kang, S., Vereecken, L., Fuchs, H., Acir, I.-H., Tillmann, R., Rohrer, F., Wildt, J., Kiendler-Scharr, A., Wahner, A., and Mentel, T. F.: Highly Oxygenated Organic Nitrates Formed from NO<sub>3</sub> Radical-Initiated Oxidation of  $\beta$ -Pinene, *Environ. Sci. Technol.*, 10.1021/acs.est.1c03978, 2021.
- Song, J., Li, M., Jiang, B., Wei, S., Fan, X., and Peng, P. a.: Molecular Characterization of Water-Soluble Humic like Substances in Smoke Particles Emitted from Combustion of Biomass Materials and Coal Using Ultrahigh-Resolution Electrospray Ionization Fourier Transform Ion Cyclotron Resonance Mass Spectrometry, *Environ. Sci. Technol.*, 52, 2575-2585, <https://doi.org/10.1021/acs.est.7b06126>, 2018.
- Su, S., Xie, Q., Lang, Y., Cao, D., Xu, Y., Chen, J., Chen, S., Hu, W., Qi, Y., Pan, X., Sun, Y., Wang, Z., Liu, C.-Q., Jiang, G., and Fu, P.: High Molecular Diversity of Organic Nitrogen in Urban Snow in North China, *Environ. Sci. Technol.*, 55, 4344-4356, <https://dx.doi.org/10.1021/acs.est.0c06851>, 2021.
- Sun, W., Hu, X., Fu, Y., Zhang, G., Zhu, Y., Wang, X., Yan, C., Xue, L., Meng, H., Jiang, B., Liao, Y., Wang, X., Peng, P., and Bi, X.: Different formation pathways of nitrogen-containing organic compounds in aerosols and fog water in northern China, *Atmos. Chem. Phys.*, 24, 6987-6999, 10.5194/acp-24-6987-2024, 2024.
- Tian, L., Huang, D. D., Li, Y. J., Yan, C., Nie, W., Wang, Z., Wang, Q., Qiao, L., Zhou,

- M., Zhu, S., Liu, Y., Guo, Y., Qiao, X., Zheng, P., Jing, S. a., Lou, S., Wang, H., and Huang, C.: Enigma of Urban Gaseous Oxygenated Organic Molecules: Precursor Type, Role of NO<sub>x</sub>, and Degree of Oxygenation, *Environ. Sci. Technol.*, 57, 64-75, 10.1021/acs.est.2c05047, 2023.
- Ungeheuer, F., van Pinxteren, D., and Vogel, A. L.: Identification and source attribution of organic compounds in ultrafine particles near Frankfurt International Airport, *Atmos. Chem. Phys.*, 21, 3763-3775, 10.5194/acp-21-3763-2021, 2021.
- Wang, D., Shen, Z., Yang, X., Huang, S., Luo, Y., Bai, G., and Cao, J.: Insight into the Role of NH<sub>3</sub>/NH<sub>4</sub><sup>+</sup> and NO<sub>x</sub>/NO<sub>3</sub><sup>-</sup> in the Formation of Nitrogen-Containing Brown Carbon in Chinese Megacities, *Environ. Sci. Technol.*, 58, 4281-4290, 10.1021/acs.est.3c10374, 2024.
- Wang, K., Huang, R.-J., Brüeggemann, M., Zhang, Y., Yang, L., Ni, H., Guo, J., Wang, M., Han, J., Bilde, M., Glasius, M., and Hoffmann, T.: Urban organic aerosol composition in eastern China differs from north to south: molecular insight from a liquid chromatography-mass spectrometry (Orbitrap) study, *Atmos. Chem. Phys.*, 21, 9089-9104, <https://doi.org/10.5194/acp-21-9089-2021>, 2021a.
- Wang, Y., Zhao, Y., Li, Z., Li, C., Yan, N., and Xiao, H.: Importance of Hydroxyl Radical Chemistry in Isoprene Suppression of Particle Formation from  $\alpha$ -Pinene Ozonolysis, *ACS Earth Space Chem.*, 5, 487-499, <https://doi.org/10.1021/acsearthspacechem.0c00294>, 2021b.
- Wang, Y., Zhao, Y., Wang, Y., Yu, J. Z., Shao, J., Liu, P., Zhu, W., Cheng, Z., Li, Z., Yan, N., and Xiao, H.: Organosulfates in atmospheric aerosols in Shanghai, China:

- seasonal and interannual variability, origin, and formation mechanisms, *Atmos. Chem. Phys.*, 21, 2959-2980, 10.5194/acp-21-2959-2021, 2021c.
- Wu, R., Vereecken, L., Tsiligiannis, E., Kang, S., Albrecht, S. R., Hantschke, L., Zhao, D., Novelli, A., Fuchs, H., Tillmann, R., Hohaus, T., Carlsson, P. T. M., Shenolikar, J., Bernard, F., Crowley, J. N., Fry, J. L., Brownwood, B., Thornton, J. A., Brown, S. S., Kiendler-Scharr, A., Wahner, A., Hallquist, M., and Mentel, T. F.: Molecular composition and volatility of multi-generation products formed from isoprene oxidation by nitrate radical, *Atmos. Chem. Phys.*, 21, 10799-10824, 10.5194/acp-21-10799-2021, 2021.
- Xu, L., Yang, Z., Tsona, N. T., Wang, X., George, C., and Du, L.: Anthropogenic-Biogenic Interactions at Night: Enhanced Formation of Secondary Aerosols and Particulate Nitrogen- and Sulfur-Containing Organics from  $\beta$ -Pinene Oxidation, *Environ. Sci. Technol.*, 10.1021/acs.est.0c07879, 2021a.
- Xu, Y., Dong, X. N., He, C., Wu, D. S., Xiao, H. W., and Xiao, H. Y.: Mist cannon trucks can exacerbate the formation of water-soluble organic aerosol and PM<sub>2.5</sub> pollution in the road environment, *Atmos. Chem. Phys.*, 23, 6775-6788, <https://doi.org/10.5194/acp-23-6775-2023>, 2023.
- Xu, Z. N., Nie, W., Liu, Y. L., Sun, P., Huang, D. D., Yan, C., Krechmer, J., Ye, P. L., Xu, Z., Qi, X. M., Zhu, C. J., Li, Y. Y., Wang, T. Y., Wang, L., Huang, X., Tang, R. Z., Guo, S., Xiu, G. L., Fu, Q. Y., Worsnop, D., Chi, X. G., and Ding, A. J.: Multifunctional Products of Isoprene Oxidation in Polluted Atmosphere and Their Contribution to SOA, *Geophys. Res. Lett.*, 48, e2020GL089276,

<https://doi.org/10.1029/2020GL089276>, 2021b.

- Yassine, M. M., Harir, M., Dabek-Zlotorzynska, E., and Schmitt-Kopplin, P.: Structural characterization of organic aerosol using Fourier transform ion cyclotron resonance mass spectrometry: Aromaticity equivalent approach, *Rapid Commun. Mass Spectrom.*, 28, 2445-2454, <https://doi.org/10.1002/rcm.7038>, 2014.
- Zhang, M., Cai, D., Lin, J., Liu, Z., Li, M., Wang, Y., and Chen, J.: Molecular characterization of atmospheric organic aerosols in typical megacities in China, *npj Climate and Atmospheric Science*, 7, 230, [10.1038/s41612-024-00784-1](https://doi.org/10.1038/s41612-024-00784-1), 2024.
- Zhao, D., Pullinen, I., Fuchs, H., Schrade, S., Wu, R., Acir, I. H., Tillmann, R., Rohrer, F., Wildt, J., Guo, Y., Kiendler-Scharr, A., Wahner, A., Kang, S., Vereecken, L., and Mentel, T. F.: Highly oxygenated organic molecule (HOM) formation in the isoprene oxidation by NO<sub>3</sub> radical, *Atmos. Chem. Phys.*, 21, 9681-9704, [10.5194/acp-21-9681-2021](https://doi.org/10.5194/acp-21-9681-2021), 2021.
- Zhong, S., Chen, S., Deng, J., Fan, Y., Zhang, Q., Xie, Q., Qi, Y., Hu, W., Wu, L., Li, X., Pavuluri, C. M., Zhu, J., Wang, X., Liu, D., Pan, X., Sun, Y., Wang, Z., Xu, Y., Tong, H., Su, H., Cheng, Y., Kawamura, K., and Fu, P.: Impact of biogenic secondary organic aerosol (SOA) loading on the molecular composition of wintertime PM<sub>2.5</sub> in urban Tianjin: an insight from Fourier transform ion cyclotron resonance mass spectrometry, *Atmos. Chem. Phys.*, 23, 2061-2077, <https://doi.org/10.5194/acp-23-2061-2023>, 2023.
- Zou, C., Cao, T., Li, M., Song, J., Jiang, B., Jia, W., Li, J., Ding, X., Yu, Z., Zhang, G., and Peng, P.: Measurement report: Changes in light absorption and molecular



composition of water-soluble humic-like substances during a winter haze bloom-decay process in Guangzhou, China, *Atmos. Chem. Phys.*, 23, 963-979, <https://doi.org/10.5194/acp-23-963-2023>, 2023.
